1 Title: Shared Song Detector Neurons in *Drosophila* Male and Female Brains Drive Sex-  
2 Specific Behaviors

3

4

5

6

7 Authors: David Deutsch<sup>1\*</sup>, Jan Clemens<sup>1,2\*</sup>, Stephan Y. Thiberge<sup>1,3</sup>, Georgia Guan<sup>1</sup>, and  
8 Mala Murthy<sup>1,3,#</sup>

9 Affiliations:

10 <sup>1</sup> Princeton Neuroscience Institute, Princeton University, Princeton 08540, NJ, USA

11 <sup>2</sup> European Neuroscience Institute, Grisebachstrasse 5, Göttingen, Germany

12 <sup>3</sup> Bezos Center for Neural Circuit Dynamics, Princeton Neuroscience Institute, Princeton  
13 University, Princeton, NJ, USA

14 \* These authors contributed equally

15 # Lead contact

16

17 Correspondence: mmurthy@princeton.edu

18 Running Title: Song feature tuning and sex-specific behaviors

19

20

21 **Abstract:**

22 Males and females often produce distinct responses to the same sensory stimuli. How such  
23 differences arise – at the level of sensory processing or in the circuits that generate behavior  
24 – remains largely unresolved across sensory modalities. We address this issue in the acoustic  
25 communication system of *Drosophila*. During courtship, males generate time-varying songs,  
26 and each sex responds with specific behaviors. We characterize male and female behavioral  
27 tuning for all aspects of song, and show that feature tuning is similar between sexes,  
28 suggesting sex-shared song detectors drive divergent behaviors. We then identify higher-  
29 order neurons in the *Drosophila* brain, called pC2, that are tuned for multiple temporal aspects  
30 of one mode of the male’s song, and drive sex-specific behaviors. We thus uncover neurons  
31 that are specifically tuned to an acoustic communication signal and that reside at the sensory-  
32 motor interface, flexibly linking auditory perception with sex-specific behavioral responses.

33

## 34 **Introduction**

35 Across animals, males and females produce distinct, dimorphic behaviors in response to  
36 common sensory stimuli (e.g., pheromones, visual cues, or acoustic signals), and these  
37 differences are critical for social and reproductive behaviors (Billeter and Levine, 2013;  
38 Dulac and Wagner, 2006; Kelley, 2003; Yamamoto et al., 2013; Yang and Shah, 2014). The  
39 molecular dissection of sexual dimorphisms in the nervous system of flies and mice in  
40 particular (Cachero et al., 2010; Dulac and Wagner, 2006; Rideout et al., 2010; Stowers and  
41 Logan, 2010; Yang and Shah, 2014; Yu et al., 2010) has identified neurons involved in either  
42 processing important social cues or driving social behaviors, but it remains open as to how  
43 sex-specific behaviors to common sensory signals emerge along sensorimotor pathways. It  
44 could be that males and females process sensory information differently, leading to different  
45 behavioral outcomes, or that males and females process sensory information identically, but  
46 drive different behaviors downstream of common detectors.

47  
48 This issue has been most heavily investigated for pheromone processing. In *Drosophila*, the  
49 male pheromone cVA induces either aggression in males (Wang and Anderson, 2010) or  
50 receptivity in females (Billeter et al., 2009; Kurtovic et al., 2007). The pheromone is detected  
51 by shared circuits in males and females and the similarly processed sensory information  
52 (Datta et al., 2008) is then routed to sex-specific higher-order olfactory neurons (Kohl et al.,  
53 2013; Ruta et al., 2010) that likely exert different effects on behavior, although this  
54 hypothesis has not yet been tested. In the mouse, the male pheromone ESP1 triggers  
55 lordosis in females, but has no effect on male behavior. This pheromone activates V2Rp5  
56 sensory neurons in both sexes but, analogous to cVA processing in flies, these neurons  
57 exhibit sex-specific projection patterns in the hypothalamus that drive sex-specific behavioral  
58 responses (Haga et al., 2010; Ishii et al., 2017). For pheromone processing then, the rule  
59 appears to be that early olfactory processing is largely shared between the sexes and then  
60 common percepts are routed to separate higher-order neurons or circuits for control of  
61 differential behaviors. But does this rule apply for other modalities, or for stimuli that can be  
62 defined by multiple temporal or spatial scales (e.g. visual objects or complex sounds)? For  
63 such stimuli, selectivity typically emerges in higher-order neurons (Dicarlo et al., 2012;  
64 Gentner, 2008; Tsao and Livingstone, 2008) and we do not yet know if such neurons are  
65 shared between males and females, and therefore if dimorphic responses emerge in  
66 downstream circuits.

67

68 Here, we investigate this issue in the auditory system in *Drosophila*. Similar to birds (Fortune  
69 et al., 2011; Konishi, 1985), frogs (Gerhardt and Huber, 2002), or other insects (Ronacher et  
70 al., 2014), acoustic communication in *Drosophila* involves different behaviors in males and  
71 females relative to the courtship song. During courtship, males chase females and produce  
72 a species-specific song that comprises two major modes – pulse song consists of trains of  
73 brief pulses and sine song consists of a sustained harmonic oscillation (Bennet-Clark and  
74 Ewing, 1967). In contrast with males, females are silent but arbitrate mating decisions  
75 (Bennet-Clark and Ewing, 1969). Males use visual feedback cues from the female (rapid  
76 changes in her walking speed and her distance relative to him) to determine which song  
77 mode (sine or pulse) to produce over time (Clemens et al., 2017; Coen et al., 2014; 2016) –  
78 this gives rise to the variable structure of song bouts (Fig. 1A). Receptive females slow in  
79 response to song (Aranha et al., 2017; Bussell et al., 2014; Clemens et al., 2015; Coen et  
80 al., 2014; Cook, 1973; Crossley et al., 1995; F. Von Schilcher, 1976; Tompkins et al., 1982),  
81 while playback of courtship song to males in the presence of other flies can induce them to  
82 increase their walking speed (Crossley et al., 1995; F. Von Schilcher, 1976; Vaughan et al.,  
83 2014), and to display courtship-like behaviors (Eberl et al., 1997; Li et al., 2018; Yoon et al.,  
84 2013; Zhou et al., 2015). These behavioral differences surrounding song production and  
85 perception between *Drosophila* males and females, combined with the wealth of genetic and  
86 neural circuit tools, make the *Drosophila* acoustic communication system an excellent one in  
87 which to investigate whether males and females share common sensory detection strategies  
88 for their courtship song, and how divergent behaviors arise.

89  
90 Each major mode of *Drosophila* courtship song, sine or pulse, contains patterns on multiple  
91 temporal scales (Arthur et al., 2013; Bennet-Clark and Ewing, 1967) (Fig. 1A) – neurons that  
92 represent either the pulse or sine mode should in theory bind all of the temporal features of  
93 each mode, similar to object detectors in other systems (Bizley and Cohen, 2013; Dicarlo et  
94 al., 2012; Gentner and Margoliash, 2003; Griffiths and Warren, 2004), and their tuning  
95 should match behavioral tuning. Historically, behaviorally relevant song features have been  
96 defined based on the parameters of the species' own song (Bennet-Clark and Ewing, 1969).  
97 However, there is now ample evidence that the preferred song can diverge from the  
98 conspecific song (Amézquita et al., 2011; Blankers et al., 2015; Ryan et al., 2001) – for  
99 instance if females prefer exaggerated song features (Rosenthal and Ryan, 2011; Ryan and  
100 Cummings, 2013) or respond to signal parameters not normally produced by their male  
101 conspecifics (Hennig et al., 2016). It is therefore important to define song modes by the

102 acoustic tuning of specific behavioral outputs. This has been done for other insects (e.g.  
103 (Clemens and Hennig, 2013; D. von Helversen and O. von Helversen, 1997)) but never for  
104 flies in a systematic way that also permits a direct comparison between sexes.

105

106 To that end, we developed a behavioral assay for assessing dynamic changes in walking  
107 speed in response to sound playback in both sexes, and we then measured locomotor  
108 tuning for all features of either pulse or sine song. We found that males and females have  
109 similar tuning but different behavioral responses and that they are tuned for every major  
110 feature of the song. We then identified a small set of sexually dimorphic neurons, termed  
111 pC2 (Kimura et al., 2015; Rideout et al., 2010; Zhou et al., 2014), that serve as shared pulse  
112 song detectors in both sexes: the tuning of pC2 neurons is matched to behavioral tuning for  
113 pulse song – but not for sine song – across a wide range of temporal scales. We find that  
114 optogenetic activation of pC2 is sufficient to drive sex-specific behaviors – changes in  
115 locomotion with sex-specific dynamics as well as singing in males – and that silencing pC2  
116 neurons biases males to production of sine song. pC2 is therefore both sensory and motor  
117 with regard to pulse song – it is important both for pulse song processing and pulse song  
118 generation. Finally, we establish the importance of pC2 neurons by showing that early social  
119 experience changes both the tuning of these neurons and the tuning of the behavior. Our  
120 results indicate that the fly brain contains common pulse song detectors in males and  
121 females which control sex-specific behavioral responses to song via downstream circuits.

122

## 123 **Results**

### 124 **Comprehensive characterization of behavioral tuning for courtship song features**

125 We designed a single-fly playback assay in which individual males or females receive  
126 acoustic stimuli in the absence of any confounding social interactions, and we implemented  
127 an automated tracker to analyze changes in locomotion relative to acoustic playback (Fig.  
128 1B and Movie S1). The assay (which we refer to as FLYTRAP (**F**ly **L**ocomotor **T**Racking and  
129 **A**coustic **P**layback)) monitors dynamic changes in walking speed, which provides a readout  
130 that can be directly compared between both males and females, as opposed to slower  
131 readouts of sex-specific behaviors such as the female time to copulation (Bennet-Clark and  
132 Ewing, 1969; Zhou et al., 2014) or male-male chaining (Yoon et al., 2013; Zhou et al., 2015).  
133 Because of the high-throughput nature of our assay combined with automated tracking, we  
134 can easily test a large number of flies and song parameters, including those only rarely  
135 produced by conspecifics but to which animals might be sensitive (Coen et al. 2014; Aranha

136 et al., 2017; Bussell et al., 2014; Crossley et al., 1995; Eberl et al., 1997; Rybak et al.,  
137 2002a; 2002b; F. Von Schilcher, 1976; Yoon et al., 2013; Zhou et al., 2015). Using  
138 FLYTRAP, we systematically compared male and female locomotor tuning to 82 acoustic  
139 stimuli that span the features and timescales present in courtship song (see Supplemental  
140 Table 1). Typically, each stimulus was presented 23 times to 120 females and 120 males,  
141 generating >2500 responses per stimulus and sex (see Methods).

142

143 Previous studies that assayed either male-female copulation rates or male-male chaining  
144 often focused on behavioral selectivity for the interval between pulses in a pulse train (inter-  
145 pulse interval (IPI), Fig. 1A) (Bennet-Clark and Ewing, 1969; Rybak et al., 2002b; F. Von  
146 Schilcher, 1976; Zhou et al., 2015). We therefore started by examining behavioral tuning for  
147 IPI using the wild type strain NM91, whose acoustic response during courtship was  
148 previously characterized (Clemens et al., 2015; 2018a; Coen et al., 2016; 2014). Observed  
149 changes in speed were stimulus-locked, sex-specific and tuned to IPI (Fig. 1C). Varying  
150 stimulus intensity had minimal effect on pulse song responses (Fig. S1A, B). While females  
151 slowed down to pulse trains, males exhibited transient slowing at pulse train onset followed  
152 by a long-lasting acceleration. The transient component of the locomotor response was  
153 present for all stimuli (Fig. S1C, D, see S3A-C) and may correspond to an unspecific startle  
154 response to sound onset (Lehnert et al., 2013). The transient was also present in females  
155 but masked by the stimulus-dependent slowing that followed (Fig. 1C). Due to the briefness  
156 of the transient response, the integral change in speed following stimulus onset reflects  
157 mostly the speed during the sustained phase (Fig. S1C, D). For simplicity, we therefore used  
158 the full integral as an overall measure of behavioral tuning. We found that in FLYTRAP,  
159 female IPI tuning is a band-pass filter matched to the statistics of male song (Fig. 1D): the  
160 mode of the distribution of *Drosophila melanogaster* IPIs is centered between 30 and 50 ms  
161 and females decrease their speed most for the same IPI range, and less for shorter or  
162 longer IPIs. Males produced a similar band-pass tuning curve peaked at the same IPI range  
163 - but their locomotor response was opposite in sign (males accelerated, females  
164 decelerated). This is consistent with the results of other assays that have found band-pass  
165 tuning for IPI in both sexes (Bennet-Clark and Ewing, 1969; Rybak et al., 2002b; F. Von  
166 Schilcher, 1976; Zhou et al., 2015) and a sex-specific sign of locomotor responses (Crossley  
167 et al., 1995; F. Von Schilcher, 1976).

168

169 Interestingly, we found the behavioral tuning for IPI in seven additional wild type strains to  
170 still be sex-specific but different from strain NM91 (Fig. S2A) – these strains showed  
171 reduced tuning for IPI, even though these same wild type strains – including NM91 – display  
172 similar responses to song features in a more natural courtship assay (Clemens et al., 2017;  
173 2015; Coen et al., 2016; 2014). This indicates that these other strains may require additional  
174 cues (e.g., pheromones or visual cues) not present in FLYTRAP to fully express their  
175 preference for conspecific song features. For all subsequent analyses of locomotor tuning in  
176 FLYTRAP, we therefore chose the NM91 strain since i) acoustic responses during courtship  
177 were previously characterized (Clemens et al., 2018a; 2015; Coen et al., 2016; 2014), ii) it  
178 produced responses to song that were similar to the genetic background used for calcium  
179 imaging experiments (Fig. S2B-E), and iii) produced song responses that were consistent  
180 with those found using other assays (Crossley et al., 1995; Li et al., 2018; F. Von Schilcher,  
181 1976; Yoon et al., 2013) – for example showing slowing to pulse song in females versus  
182 acceleration to pulse song in males.

183

184 We next systematically varied parameters that characterize pulse song to cover (and extend  
185 beyond) the distribution of each parameter within *D. melanogaster* male song (just as we did  
186 for IPI) (see Fig. S3). We examined behavioral tuning in both sexes for parameters that  
187 varied on timescales of milliseconds (carrier frequency, pulse duration and IPI) to seconds  
188 (pulse train duration) (Fig. 1A). We found that male and female tuning curves are of opposite  
189 sign but similar shape for all pulse song features tested across time scales (Fig. 2A, B, see  
190 Fig. S3A-C for speed traces, S3D-F), and that the behavioral tuning for pulse parameters  
191 often overlapped the distribution found in natural song (Fig. 2C). While the behavioral tuning  
192 curves for all pulse song features on short time scales are band-pass with a well-defined  
193 peak, we found that tuning for pulse train duration was monotonous: both females and males  
194 increase their locomotor response with increasing pulse train duration up to four seconds  
195 (Fig. 2A, B). During natural courtship, pulse trains longer than four seconds are rarely  
196 produced (Coen et al., 2014) – these stimuli thus correspond to “supernormal” stimuli which  
197 drive strong behavioral response probably due to integration over long time scales  
198 (Tinbergen, 1989). Males also produce two distinct types of pulses (Clemens et al., 2018a) –  
199 we find that while females appear to be broadly tuned for both types of pulses in the  
200 FLYTRAP assay, males respond preferentially to higher frequency pulses (Fig. 2A, B).  
201 Finally, we found that both males and females are more selective for the pulse duration  
202 versus the pulse pause, the two components of the IPI (Fig. S3D-F) – this is in contrast to



203 other insects that produce and process song pulses (e.g. crickets, grasshoppers, katydids),  
204 and that are preferentially tuned to pulse pause, pulse period or pulse train duty cycle  
205 (Hennig et al., 2014; Ronacher et al., 2014).

206

207 We next tested locomotor tuning for the parameters that characterize sine stimuli – carrier  
208 frequency and the duration of sine trains (Fig. 1A). Both males and females slow for sine  
209 tones of different frequencies, with very low and very high frequencies eliciting the strongest  
210 responses (Fig. 2A, B and Fig. S3A-C). Notably, the frequencies inducing the strongest  
211 slowing (100 Hz) are not typically produced by males (Fig. 2C). As for sine train duration  
212 tuning, we observed sustained responses that increased with duration and saturated only  
213 weakly, possibly because of the weak response magnitude.

214

215 Pulse and sine song usually co-occur within a single bout but it is not known why males  
216 produce two different modes (although females respond to both during natural courtship  
217 (Clemens et al., 2017; Coen et al., 2014)). One possibility is that one mode exerts a priming  
218 effect on the other (F. V. Schilcher, 1976). To test interactions between the two song modes,  
219 we presented sequences in which a 2-second pulse train was followed by a 2-second sine  
220 tone or in which a sine tone was followed by a pulse train and compared the responses for  
221 these sequences to the responses to an individual pulse train or sine tone (Fig. S3G). The  
222 responses are well explained by a linear combination of the responses to individual sine or  
223 pulse trains. Deviations from linearity occur due to sound onset responses, but otherwise  
224 responses do not strongly depend on the order of presentation in a bout (see also (Talyn  
225 and Dowse, 2004)). This suggests that these stimuli are processed in independent  
226 pathways.

227

228 To summarize, we compared behavioral responses in males and females from the strain  
229 NM91 for all features that define the courtship song. We found that male and female speed  
230 changes were strongly correlated for both song modes but that the sign of the correlation  
231 was negative for pulse stimuli and positive for sine stimuli (Fig. 2E). The opposite sign of the  
232 correlations along with the independence of responses to sine and pulse stimuli (Fig. S3G)  
233 indicates that sine and pulse song are processed by different circuits. The large magnitude  
234 of the correlations implies that feature tuning of the behavioral responses is similar between  
235 sexes and suggests that detector neurons for each song mode should be shared between  
236 sexes.



237

### 238 **Hearing pulse song drives wing extension in males, but not in females**

239 Another sex-specific aspect of song responses is courtship: playback of conspecific song  
240 induces courtship-like behavior in males – this can even be directed towards other males,  
241 leading to the male chaining response, in which males follow other males, chasing and  
242 extending their wings (Eberl et al., 1997; F. Von Schilcher, 1976; Yoon et al., 2013). In our  
243 single-fly assay, males lack a target for courtship and the song-induced arousal likely  
244 manifests as an increase in speed. Since FLYTRAP does not permit simultaneous recording  
245 of fly acoustic signals during playback, we quantified wing extension as a proxy for singing,  
246 and examined whether song playback alone drives singing in solitary males. We found that  
247 solitary males extend their wings in response to pulse song stimuli specifically (Fig. 2F, G,  
248 Movie S2). This behavior is tuned for the inter-pulse interval (similar to the locomotor  
249 response, Fig. 1D) – the conspecific IPI of 36 ms drives the most wing extension, and  
250 shorter and longer IPIs evoke fewer wing extensions. By contrast, conspecific sine song  
251 (150 Hz) does not induce wing extension (Fig. 2F) (see also (Eberl et al., 1997; Yoon et al.,  
252 2013)). We also found that playback of pulse does not elicit wing extension in females, even  
253 though females have been shown to possess functional circuitry for singing (Clyne and  
254 Miesenböck, 2008; Rezával et al., 2016) – wing extension in response to pulse song is thus  
255 sex-specific.

256 These results are consistent with those for locomotor tuning: pulse song, but not sine song,  
257 generates sex-specific differences in the behavior of the strain NM91. The identical tuning of  
258 the two behavioral responses in males (locomotion (Fig. 1C) and song production (Fig. 2G))  
259 suggests that the behavioral responses are driven by a common circuit.

260

### 261 ***Drosophila* male and female brains share pulse song detector neurons**

262 Our systematic exploration of song stimulus space using the FLYTRAP assay revealed  
263 behavioral tuning for song parameters across temporal scales (from the carrier frequencies  
264 of sine and pulse lasting milliseconds to the duration of sine and pulse trains lasting  
265 seconds). We next searched for neurons with tuning across temporal scales that detect  
266 either the pulse or sine mode of courtship song. We focused on neurons expressing the  
267 Doublesex (Dsx) transcription factor that regulates sexual dimorphism in cell number and  
268 neuronal morphology between males and females. In the central brain there are ~70 Dsx+  
269 neurons per hemisphere in females and ~140 Dsx+ neurons per hemisphere in males  
270 (Kimura et al., 2015; Rideout et al., 2010). Previous studies found calcium responses to both

271 song-like stimuli and pheromones in Dsx+ neuron projections in females (Zhou et al., 2014)  
272 and tuning for the inter-pulse interval in males (Zhou et al., 2015). In addition, silencing  
273 subsets of Dsx+ neurons in females affected receptivity (Zhou et al., 2014). These data  
274 suggest that Dsx+ neurons could serve as the common pulse song detectors in males and  
275 females. To test this possibility, we recorded auditory responses in Dsx+ neurons and  
276 examined tuning for song features across timescales, in both males and females, to  
277 compare with our behavioral results.

278

279 We imaged neural activity using the calcium sensor GCaMP6m (Chen et al., 2013)  
280 expressed only in Dsx+ neurons. While we found no auditory response in the superior  
281 medial protocerebrum (SMP), we did find responses in the lateral junction (LJ) (Cachero et  
282 al., 2010; Ito et al., 2014; Yu et al., 2010), a site of convergence for the majority of Dsx+  
283 neuron projections (Fig. 3A, B, S5B, C, Movie S3, S4). We found that male and female Dsx+  
284 projections in the LJ are driven strongly by pulse but not by sine stimuli (Fig. 3C), confirming  
285 previous results (Zhou et al., 2014). While males produce weaker responses to auditory  
286 stimuli compared with females (Fig. 3C), the selectivity of Dsx+ LJ responses is highly  
287 correlated between sexes – stimuli that evoked the strongest responses in females also  
288 evoked the strongest responses in males (Fig. 3D).

289

290 When examining neuronal tuning curves, we found a good match between Dsx+ LJ  
291 responses and the magnitude of changes in speed across all timescales of pulse song in  
292 both sexes (Fig. 3E, F). Results were similar whether we used the integral  $\Delta F/F$  or the peak  
293  $\Delta F/F$  to quantify tuning (Fig. S4F, G). For example, the Dsx+ LJ tuning curve for IPI is similar  
294 in females and males with the strongest responses at 36 ms, matching the behavioral tuning  
295 curves (compare with Fig. 2A-B and S2B-C). On longer timescales, LJ tuning curves also  
296 match behavioral tuning curves for pulse train duration, with the integral calcium increasing  
297 with train duration in both sexes, similar to the behavioral response. Overall, LJ responses  
298 are highly selective for multiple features found in conspecific pulse song: Dsx+ LJ responses  
299 were strongest for stimuli with a carrier frequency of 250 Hz, an inter-pulse interval of 36 ms,  
300 and a pulse duration of 16 ms (Fig. S4C-E). A match in only two of these three features was  
301 not sufficient to maximally drive Dsx+ LJ projections (Fig. 3G) – a mismatch in a single pulse  
302 song feature reduced calcium responses between 20% and 80%. Sine stimuli have lower  
303 carrier frequencies, long durations, and no pauses (they are by definition continuous) –  
304 which explains the weak responses of Dsx+ LJ neurons to all sine stimuli (Fig. 3C).

305 Likewise, broadband noise also lacks the correct pattern of amplitude modulations and  
306 accordingly does not strongly drive the Dsx+ LJ neurons (see also Fig. 4D). Given this high  
307 selectivity for the features defining conspecific pulse song, it is unlikely that the LJ would be  
308 driven by other naturally occurring stimuli. For instance, wind stimuli typically contain lower  
309 frequencies (Nagel and Wilson, 2011) and lack the periodical pattern of pulse trains required  
310 to strongly drive Dsx+ LJ neurons, and aggression song differs from courtship pulse song in  
311 carrier frequency and in IPI (Versteven et al., 2017).

312

313 To more directly show that Dsx+ LJ neurons are shared pulse song detectors, we matched  
314 neuronal and behavioral responses for the same stimuli. Given the observed strain-  
315 dependence of behavioral responses in FLYTRAP (Fig. S2A), we compared behavioral and  
316 neuronal tuning within the same genotype (Dsx/GCaMP). In FLYTRAP, Dsx/GCaMP flies  
317 produced weaker behavioral responses, but nonetheless, their tuning for song features was  
318 matched to that of wild type strain NM91 (Fig. S2B-E). Male neural and behavioral tuning for  
319 pulse stimuli are positively correlated ( $r=0.61$ ,  $p=1 \times 10^{-5}$ ) – high Dsx+ LJ neuron activity  
320 correlates with the most acceleration (Fig. 3H). Female neural and behavioral tuning for  
321 pulse stimuli are negatively correlated ( $r=-0.53$ ,  $p=3 \times 10^{-4}$ ) – high Dsx+ LJ neuron activity  
322 correlates with the most slowing (Fig. 3I). This is consistent with these neurons controlling  
323 the magnitude, but not the direction of speed changes. We observed no statistically  
324 significant correlation for sine stimuli (male:  $r=0.17$ ,  $p=0.49$ ; female:  $r=0.28$ ,  $p=0.25$ ), as  
325 Dsx+ LJ responses to sine stimuli were weak. We obtained a similar pattern of correlations  
326 when using behavioral data from the wild type strain NM91 for comparison instead (Fig.  
327 S4H-I). Note that Dsx+ LJ activity only accounts for roughly 1/3 of the variability in behavioral  
328 responses for pulse song. This suggests that the behavior is driven and modulated by  
329 additional pathways outside of the Dsx+ neurons in the LJ or that most of the variability  
330 arises in downstream circuits. Nonetheless, Dsx+ neurons that innervate the LJ have tuning  
331 properties expected for pulse song detectors – they prefer pulse over sine stimuli, are  
332 similarly tuned in males and females, and their feature tuning matches the behavioral tuning  
333 for all pulse, but not sine, stimuli across timescales.

334

### 335 **Dsx+ pC2 neurons are tuned like the LJ and to conspecific pulse song**

336 The Dsx+ neurons of the central brain form a morphologically heterogeneous population with  
337 several distinct, anatomical clusters many of which project to the LJ (Kimura et al., 2015;  
338 Rideout et al., 2010; Zhou et al., 2015; 2014) (Fig. 3A). Previous studies that examined

339 auditory responses in Dsx+ neurons (Zhou et al., 2015; 2014) did not resolve which subtype  
340 carried the response. Using a stochastic labeling approach (Nern et al., 2015), we confirmed  
341 that five out of eight Dsx+ cell types in the female brain have projections into the LJ (Kimura  
342 et al., 2015): pC1, pC2l/m, pMN1, and pMN2, but not pCd1/2 and aDN (Fig. 4A and Fig.  
343 S5D, E). We next imaged calcium responses to pulse and sine stimuli in the somas of all five  
344 Dsx+ cell types that innervate the LJ and found that a subset of neurons in the pC1 and pC2  
345 clusters possess auditory responses, in addition to cell type pMN2 (a VNC-projecting  
346 female-specific neuron (Kimura et al., 2015) comprising only one cell body per hemisphere)  
347 (Fig. 4B, C, Movie S5, S6). All responsive cells preferred pulse over sine or noise stimuli  
348 (Fig. 4D). We did not observe auditory responses in pMN1 neurons (not shown), although  
349 we cannot rule out that this neuron class has responses that are below the level of detection  
350 by the Calcium indicator GCaMP6m.

351

352 The pC1 cluster – which was previously considered the only Dsx+ auditory neuron in the LJ  
353 (Zhou et al., 2015; 2014) – contained very few somas with calcium responses to sound (2-3  
354 cells in the female brain; none in the male brain) (Fig. 4C). By contrast, we found ~15  
355 auditory neurons in the pC2 cluster in each animal (this number is an underestimate since  
356 somas overlap; see Methods). While pC1 and pMN2 likely contribute to the LJ responses,  
357 they contain few auditory-responsive neurons and/or are present only in females. We  
358 therefore focused on pC2 as the putative pulse song detector common to both sexes.

359

360 Although there are more pC2 neurons in males versus females (~67 vs. ~26, (Kimura et al.,  
361 2015)) the number of auditory neurons is similar in both sexes (~15). pC2 neurons can be  
362 subdivided into a lateral and a medial type, termed pC2l and pC2m (Robinett et al., 2010),  
363 and each type projects to the lateral junction via a distinct bundle of neurites (see Fig. 3A,  
364 S5B, C). Most auditory neurons were lateral in the pC2 cluster in both sexes (Fig. S5A), and  
365 pC2l neurites produced strong auditory responses. However, we did observe auditory  
366 responses from some pC2m neurons indicating that auditory activity is not exclusive to pC2l  
367 (Fig. S5A). While tuning differed slightly between individual pC2 neurons, no single cell was  
368 specialized to detect specific features of the pulse song (Fig. S5F) and responses of single  
369 cells and the LJ were highly correlated in both sexes (Fig. 4F-H). From this we conclude that  
370 LJ responses reflect the tuning of pC2l neurons. Importantly, the tuning of the pC2l neurites  
371 in the LJ matches the behavioral tuning in both sexes (Fig. 4I-J and Fig. S5G-H), indicating  
372 that pC2l neurons are selective for conspecific pulse song.

373

374 **Circuits parallel to or downstream of pC2I strongly contribute to behavioral variability**

375 The match between behavioral and pC2 tuning suggests that pC2 contributes to the sex-  
376 specific responses to song. If locomotor responses were driven mainly by pC2, then the  
377 variability in pC2 tuning across animals would explain most of the variability in behavioral  
378 responses across animals. On the other hand, if locomotor responses were controlled by  
379 parallel pathways or by circuits downstream of pC2, then the variability in pC2 would be  
380 much lower than the behavioral variability across animals. We compared individual variability  
381 of male song, female pC2 neural responses, and female locomotor responses (Fig. 4K) and  
382 focused on the pulse song feature for which we had the most data – inter-pulse interval (IPI).  
383 We found a steady increase in variability from song to brain to behavior. Song is consistent  
384 across individuals – the IPI distribution for each male peaks between 36 and 56 ms. pC2  
385 (LJ) responses are more variable than song but still relatively consistent across animals –  
386 pC2 in 7/11 females responds most strongly between 36 and 76 ms. By contrast, behavioral  
387 responses are highly variable – only half of the flies slow most strongly to IPIs between 36  
388 and 76 ms. Variability at the level of locomotor responses increases for other song features,  
389 too (data not shown). Overall, this suggests that locomotor responses in FLYTRAP are  
390 strongly affected by pathways parallel or downstream of pC2. This must be considered when  
391 interpreting experiments that test the role of pC2 in driving behavioral responses to song.

392

393 **Activation and inactivation of pC2I neurons affects sex-specific behaviors**

394 Given that pC2I neurons are tuned to the conspecific pulse song, we expected that their  
395 activation could also contribute to the sex-specific behaviors observed for pulse song –  
396 changes in locomotion and singing that are distinct between males and females. To test this  
397 hypothesis, we used a driver line (Rezával et al., 2016; Zhou et al., 2014) that labels 11/22  
398 female and 22/36 male pC2I neurons, in addition to 5-6 pCd neurons, but no pC2m or pC1  
399 neurons (Fig. S6A). At least 5 of the pC2I cells in this driver line responded to song (Fig.  
400 S6B), which corresponds to ~1/3 of the auditory pC2I neurons. We expressed CsChrimson,  
401 a red-shifted channelrhodopsin (Klapoetke et al., 2014), in these neurons and  
402 optogenetically activated them in both males and females.

403

404 We first recorded behavior in a chamber tiled with microphones (Coen et al., 2014) to test  
405 whether pC2 activation was sufficient to induce singing, as we previously showed that pulse  
406 song playback alone drives wing extension in males (Fig. 2F, G). Upon red light activation,

407 males produced pulse song, while sine song was produced transiently after stimulus offset  
408 (Fig. 5A, Movie S7), and the amount of pulse song produced scaled with the strength of  
409 activation (Fig. 5B-C). The evoked pulse and sine songs were virtually indistinguishable from  
410 natural song (Fig. S6C, D). In *Drosophila*, retinal (the channelrhodopsin cofactor) must be  
411 supplied via feeding, and red light stimulation drove singing significantly more in males fed  
412 with retinal versus those fed regular food (Fig. S6E). Activation of a control line that only  
413 labels pCd neurons (Zhou et al., 2014) did not drive singing (Fig. S6E), implying that song  
414 production results from the activation of the pC2 neurons in our driver. Importantly, we never  
415 observed song production upon pC2 activation in females (Fig. 5D-E) – pC2 neurons thus  
416 drive song in a sex-specific manner. These results also establish pC2 neurons as serving a  
417 dual sensory and motor role: they respond selectively to the pulse song (Fig. 3C, F) and also  
418 bias the song pathway towards producing the same song mode (Fig. 5A, B).

419

420 We next tested whether inactivation of pC2 affected song production during courtship, by  
421 constitutively suppressing the synaptic output of pC2 (via expression of TNT (Sweeney et  
422 al., 1995)) in males courting wild type virgin females (see Methods). Males with a genetically  
423 silenced subset of pC2 neurons still sang, demonstrating that the driver did not label  
424 neurons that were required for singing or that other neurons can substitute for the missing  
425 activity of pC2 (Clemens et al., 2018a; Philipsborn et al., 2011). The fine structure of the  
426 song was wild-type like with normal IPIs, pulse shapes, and carrier frequencies (Fig. S6F, G)  
427 and copulation rates were normal (Fig. S6H). Surprisingly, pC2I-silenced males sang about  
428 twice as much as the controls, and this effect was largely driven by the production of more  
429 sine song (Fig. 5F). Given that pC2 activation yielded virtually no sine song during  
430 optogenetic stimulation (Fig. 5A, B), this suggests that pC2 inhibits sine song production  
431 during natural courtship and generally demonstrates that song production in *Drosophila*  
432 involves a complex control scheme (see also (Clemens et al., 2018a; Philipsborn et al.,  
433 2011; Shirangi et al., 2013)).

434

435 The genetic manipulations so far demonstrate that pC2 can drive behavior in a sex-specific  
436 manner – driving song only in males. FLYTRAP also revealed pC2 sex-specific locomotor  
437 responses. In the wild type strain NM91, these responses were similarly tuned but of  
438 opposite sign in both sexes (Fig. 1, 2). Although the behavioral tuning differed for other  
439 strains, the locomotor responses to song were still sex-specific (Fig. S2A). To test whether  
440 pC2 activation can produce sex-specific locomotor responses, we placed flies in the



441 FLYTRAP assay and used red light for activation (instead of sound). Given the genotype  
442 dependence of the locomotor tuning, we expressed csChrimson in pC2 using two different  
443 genotypes. Both carried the same transgenes for expressing csChrimson in pC2 neurons,  
444 but one carried half of its chromosomes from the NM91 wild type strain – these genotypes  
445 are called “pC2l-csChrimson” and “pC2l-csChrimson/NM91” (see Methods). Both strains  
446 produced song upon optogenetic activation in males but not in females (Fig. 5A-E, S6I, J). In  
447 FLYTRAP, these strains produced different but nonetheless sex-specific locomotor  
448 responses for IPI stimuli (Fig. S2A), allowing us to test whether locomotor responses evoked  
449 by pC2 activation are robustly sex-specific despite genotype-specific locomotor tuning. To  
450 account for innate visual responses to the light stimulus, we subtracted the responses of  
451 normally fed flies from retinal fed flies (Fig. S6K, L).

452

453 For both strains, optogenetic activation of pC2 yielded sex-specific locomotor responses. For  
454 pC2l-csChrimson, we observed complex, multiphasic locomotor dynamics, with males  
455 tending to slow down and females tending to speed up with increasing optogenetic activation  
456 (Fig. 5G, H). For pC2l-csChrimson/NM91, we observed simpler, bi-phasic responses –  
457 females first sped up during activation and slowed down after, while males sped up for a  
458 short period after stimulation onset only (Fig. 5J). For this genotype, responses differed little  
459 across activation levels (Fig. 5K). Importantly, locomotor responses were sex-specific in both  
460 genotypes, which we confirmed using principal component analysis (PCA) of the speed  
461 traces of males and females (Fig. 5I, L). The first two principal components were sufficient to  
462 explain 80% and 99% of the variance in the speed traces, and the responses occupy non-  
463 overlapping regions in the principal component space. However, pC2 activation in neither  
464 strain reproduced the responses to pulse trains of varying IPI (for the same strain) in  
465 FLYTRAP (cf. Fig. S2A). This could be because optogenetic activation does not recapitulate  
466 brain dynamics evoked by song – either because the pC2 activation levels were not  
467 matched or because song activates multiple circuits that all affect the locomotor responses  
468 (Jazayeri and Afraz, 2017). While these issues have to be addressed to fully understand  
469 how the responses to playback of song are driven, the results show that pC2 is one of several  
470 elements that contribute to the locomotor tuning for song.

471

472 Finally, we used the pC2l-csChrimson driver to constitutively suppress the synaptic output of  
473 pC2 (via expression of TNT (Sweeney et al., 1995)) in females and paired them with wild  
474 type virgin males (see Methods). We quantified female song responses as the correlation



475 between different song features and female speed (Clemens et al., 2015; Coen et al., 2014)  
476 (Fig. 5M-O). Because male song is structured via sensory feedback cues from the female  
477 (Coen et al., 2014), silencing pC2 neurons in females could affect the content of male song  
478 – however, the statistics of male song were unchanged by the female manipulation (Fig.  
479 S6M, N). pC2 inactivation specifically affected the correlation between female speed and the  
480 pulse song IPI, which changed from  $\sim 0$  to  $+0.3$  (Fig. 5M-O). While control – and wild type  
481 (Clemens et al., 2015) – females do not change their speed relative to the range of natural  
482 IPIs produced by conspecific males (Fig. 1), females with pC2 neurons silenced accelerate  
483 more with increasing IPI. pC2 neurons are therefore required for the normal response to  
484 pulse song. The remaining responses to pulse could be caused by pC2 neurons not silenced  
485 by our genetic driver or by other neurons tuned for longer IPIs (Zhou et al., 2015). While  
486 female locomotor responses to courtship song were affected by pC2 inactivation, copulation  
487 rates were not significantly reduced (Fig. S6O), consistent with previous studies (Zhou et al.,  
488 2014). In conjunction with the match between behavioral tuning and pC2 tuning, these  
489 results add to the evidence that pC2 neurons detect pulse song and play a critical role at the  
490 sensorimotor interface – they relay information about pulse song to sex-specific downstream  
491 circuits that control either singing or locomotion, and thereby contribute to acoustic  
492 communication behaviors.

493

#### 494 **Auditory responses of pC2 are modulated by social experience**

495 Many sexual behaviors change with social experience (Keleman et al., 2012; Li et al., 2018;  
496 Marlin et al., 2015; Remedios et al., 2017). This plasticity could be mediated by modulating  
497 the selectivity and the gain of the neurons that detect social cues or of the neurons that drive  
498 the behaviors. Social experience is also known to affect courtship behavior in *Drosophila*  
499 (Ellis and Kessler, 1975; Kohatsu and Yamamoto, 2015; F. Von Schilcher, 1976). In  
500 particular, a recent study has shown that group housing sharpens the IPI selectivity of the  
501 female mating decision and of the male chaining response, and that this effect is mediated  
502 by the exposure of song from other flies in the group (Li et al., 2018). However, we do not  
503 yet know which elements in the pathway from song to behavior are affected by social  
504 experience. Given that pC2 contributes to behavioral responses to song, we asked whether  
505 its activity is modulated by housing conditions. The behavioral results presented so far were  
506 obtained from group-housed flies so we also ran single-housed males or females to confirm  
507 that locomotor responses in FLYTRAP are modulated by social experience. We found that  
508 single-housed males responded with little selectivity to pulse trains with different IPIs (Fig.

509 6A). This is consistent with the previous study (Li et al., 2018), since group-housed males  
510 are exposed to the song of other males during rearing. That we can reproduce these results  
511 in a single-fly assay shows that acoustic cues are sufficient to express the effect – previous  
512 experiments had used multi-fly assays, leaving open the possibility of other cues being  
513 required – e.g. social experience could also affect the song selectivity by altering the  
514 pheromonal modulation of acoustic responses. By contrast, females do not sing to other  
515 females and accordingly, their locomotor responses are unaffected by the housing condition.  
516 Consistent with the behavior, calcium responses in pC2 (measured via the LJ) (Fig. 4F-H)  
517 do not change strongly with housing conditions in females but become more selective for IPI  
518 in group-housed males (Fig. 6B, C). Notably, sine song responses and responses to pulse  
519 trains with different durations are not affected by housing conditions (Fig. S7). This suggests  
520 that pC2 could mediate the effect of social experience on the behavioral responses to song.

521

## 522 **Discussion**

523 Using a quantitative behavioral assay, we characterized locomotor responses in both males  
524 and females to the features that define the *Drosophila melanogaster* courtship song. Males  
525 and females of the wild type strain NM91 showed similar tuning for pulse song stimuli, but  
526 nonetheless produced distinct responses (males accelerate while females decelerate; males  
527 sing while females do not) (Fig. 1, 2). For both males and females and across multiple  
528 timescales, tuning was matched to the distribution of each parameter in the male's pulse  
529 song. We then identified Dsx+ pC2 neurons in the brain that respond selectively to all  
530 features of pulse song stimuli, and whose tuning is matched to behavioral tuning (Fig. 3, 4).  
531 The activation of pC2 neurons elicited sex-specific behavioral responses to pulse song (Fig.  
532 5), and social experience sharpened both behavioral feature selectivity and pC2 tuning (Fig.  
533 6). We thus conclude that Dsx+ pC2 neurons connect song detection with the execution of  
534 sex-specific behaviors.

535

### 536 ***Matches between behavioral tuning and conspecific song***

537 Behavioral selectivity for species-specific signals is thought to serve species separation. In  
538 FLYTRAP, locomotor tuning in NM91 and Dsx/GCaMP females overlaps with the conspecific  
539 song – these females slow to conspecific song (Fig. 2A) and do not change their speed or  
540 may even accelerate for deviant pulse parameters (Fig. S3A, E). However, the tuning for any  
541 single song feature is not sufficiently narrow to serve as an effective filter for conspecific  
542 song. For instance, NM91 and Dsx/GCaMP females also slow for IPIs produced by a sibling

543 species *D. simulans* (50-65 ms) (Bennet-Clark and Ewing, 1969). However, *D. simulans*  
544 pulses would be rejected based on a mismatch in other song features – *D. simulans* pulses  
545 are too short and of too high frequency to be accepted by females (Clemens et al., 2017;  
546 Riabinina et al., 2011). Selectivity for multiple song features may thus enable species  
547 discrimination with relatively broad single-feature tuning (Amézquita et al., 2011). Males and  
548 females are exposed to additional non-acoustic cues during courtship that may further  
549 sharpen behavioral tuning. For instance, chemical cues prevent males from courting  
550 heterospecific females (Fan et al., 2013) and likely also contribute to female rejection  
551 (Billeter et al., 2009; Rybak et al., 2002b) – it will be interesting to explore how non-auditory  
552 cues (Keleman et al., 2012; Zhang et al., 2016) modulate locomotor responses to song and  
553 whether multi-modal integration occurs in pC2 neurons or elsewhere. The absence of non-  
554 acoustic cues may explain the diversity of locomotor responses across strains in the  
555 FLYTRAP assay (Fig. S2). Using a naturalistic courtship assay, previous studies show that  
556 the same strains as the ones tested in FlyTRAP exhibit similar behaviors – males pattern  
557 their song in response to the female behavior and females change their locomotor speed to  
558 the natural courtship song similarly across all strains (Clemens et al., 2017; 2015; Coen et  
559 al., 2016; 2014).

560  
561 In contrast to pulse song responses, the locomotor and singing responses for sine song in  
562 FLYTRAP were less sex-specific (Fig. 2E) and the behavioral tuning did not match well the  
563 conspecific song – very low frequencies never produced by males slowed NM91 females the  
564 most (Fig. 2A, B). This implies divergent roles for the two song modes and is consistent with  
565 previous studies (Eberl et al., 1997; F. V. Schilcher, 1976) – for instance sine song does not  
566 induce male-male courtship (Yoon et al., 2013). It has been suggested that pulse song may  
567 modulate sine song responses (F. V. Schilcher, 1976) but we did not detect strong serial  
568 interactions between the two song modes (Fig. S3G). Alternatively, responses to sine song  
569 may depend more strongly on the presence of male chemical cues (Billeter et al., 2009;  
570 Kurtovic et al., 2007) that are absent in the FLYTRAP assay. This is consistent with sine  
571 song being produced when the male is near the female (Coen et al., 2014) – that is, when  
572 these chemical cues are particularly strong.

573

#### 574 ***Pathways for detecting sine and pulse***

575 Our behavioral and neuronal results suggest that pulse and sine song are processed in  
576 parallel pathways (Fig. 2E, 3C, F-H) but it is unclear as of yet how and where sounds are

577 split into different streams. Sine and pulse can be separated based on spectral and temporal  
578 properties (Fig. S5). In fact, the frequency tuning in auditory receptor neurons (JON) and  
579 first-order auditory brain neurons (AMMC) may already be sufficient to separate the lower-  
580 frequency sine (150 Hz) from the higher-frequency pulse (>220 Hz) (Azevedo and Wilson,  
581 2017; Ishikawa et al., 2017; Kamikouchi et al., 2009; Patella and Wilson, 2018; Yorozu et al.,  
582 2009). Temporal pattern could further discriminate pulse from sine by either suppressing  
583 responses to the sustained sine via adaptation or by tuning temporal integration such that  
584 the brief pulse stimuli fail to drive neuronal spiking. A complete mapping of auditory  
585 pathways and auditory activity throughout the *Drosophila* brain is required to identify where  
586 and how the neural selectivity for the different song modes arises.

587

588 Here, we have identified pC2 as one of the pathways driving responses to pulse song – pC2  
589 tuning matches the behavioral tuning for pulse song (Fig. 3H, I), pC2 activation drives sex-  
590 specific responses to song (Fig. 5), and experience-dependent modulation of pC2 tuning  
591 matches the behavioral tuning (Fig. 6). Importantly, our data also indicate that pC2 neurons  
592 are not the only neurons used to detect pulse song, since the variability of pC2 neurons  
593 across stimuli and individuals does not account for the full behavioral variability (Fig. 3H, I,  
594 Fig. 4I-K). Interestingly, previous studies have implied pC1 as a pulse song detector (Zhou  
595 et al., 2015; 2014). Like pC2, pC1 exists in males and females (Rideout et al., 2010), and  
596 activation drives several courtship-related behaviors in males – including singing, male-male  
597 courtship, and aggression (Koganezawa et al., 2016; Kohatsu et al., 2011; Pan et al., 2012;  
598 Philipsborn et al., 2011; Zhou et al., 2015) – and also in females (Li et al., 2018; Rezával et  
599 al., 2016; Zhou et al., 2014). All previous studies have relied on imaging activity in the lateral  
600 junction (LJ) to show that pC1 preferentially responds to pulse song (Zhou et al., 2015;  
601 2014). However, we show here that calcium responses of Dsx+ neurons in the LJ reflect the  
602 auditory activity of multiple Dsx+ cell types – and we detected auditory responses in the  
603 somas of pC2, pC1 (only in females) and pMN2 (a female only neuron) (Fig. 4). Because the  
604 number of auditory neurons within the pC2 cluster is much larger than for pC1 or pMN2 (Fig.  
605 4C), and because tuning in pC2 somas matches the tuning in the LJ (Fig. 4E-H), we  
606 conclude that the LJ activity largely reflects pC2 responses. Nonetheless, we have not  
607 exhaustively assessed the match between the neuronal responses of female pC1 and pMN2  
608 neurons and behavior. Those neurons may also be critical for the female's response to pulse  
609 song, including behaviors not investigated here (such as oviposition (Kimura et al., 2015)).

610

611 ***Inputs and outputs of pC2 neurons***

612 pC2 neurons bind different properties of the pulse song to selectively signal the presence of  
613 conspecific pulse song – pC2 is tuned to several features of pulse song like pulse carrier  
614 frequency, pulse duration, and inter-pulse interval and a match in only one feature is not  
615 sufficient to strongly drive these neurons (Fig. 3, S4C-E). How this selectivity arises is as of  
616 yet unclear since systematic studies of tuning for multiple pulse song features in the early  
617 auditory pathway are missing. However, existing evidence suggests that pC2 may acquire  
618 its feature selectivity in a serial manner – via a cumulative sharpening of tuning for song  
619 features at successive stages of auditory processing (Kamikouchi et al., 2009; Yamada et  
620 al., 2018; Zhou et al., 2015; 2014). Auditory receptor neurons display diverse and specific  
621 band-pass tuning for carrier frequency (Ishikawa et al., 2017; Kamikouchi et al., 2009;  
622 Patella and Wilson, 2018; Yorozu et al., 2009) and first order auditory B1 neurons further  
623 sharpen frequency tuning via resonant conductances (Azevedo and Wilson, 2017). Likewise,  
624 peripheral responses are already weakly tuned for IPI (Clemens et al., 2018b; Ishikawa et  
625 al., 2017) and this tuning is further sharpened in downstream neurons (Vaughan et al., 2014;  
626 Zhou et al., 2015) through the interplay of excitation and inhibition (Yamada et al., 2018).  
627 This serial sharpening is similar to how selectivity for pulse song arises in crickets, in which  
628 a delay-line and coincidence detector mechanism produces broad selectivity for pulse  
629 duration and pulse pause which is subsequently sharpened in a downstream neuron  
630 (Schöneich et al., 2015). More direct readouts of the membrane voltage of auditory neurons  
631 in the fly brain are required to determine the biophysical mechanisms that generate song  
632 selectivity in pC2.

633

634 Similarly, the circuits downstream of pC2 neurons that control the diverse and sex-specific  
635 behaviors reported here remain to be identified. Our assessment of inter-individual variability  
636 in IPI preference revealed that most of the behavioral variability does not arise at the level of  
637 pC2 neurons (Fig. 4K). This suggests that variability in parallel or in downstream pathways  
638 strongly contributes to the locomotor tuning – pC2 activity is only one of multiple  
639 determinants of the behavior. This is consistent with optogenetic activation of pC2 being  
640 insufficient to produce the song-induced locomotor dynamics (Fig. S3, 5G,J). Still, our  
641 results demonstrate that pC2 drives sex-specific downstream circuits. pC2 neurons may  
642 connect directly with descending interneurons (DNs) (Cande et al., 2017; Namiki et al.,  
643 2017) that control motor behaviors. For example, pC2 activation in males drives pulse song  
644 production, followed by sine song production at stimulus offset (Fig. 5A). This behavior

645 resembles that caused by pIP10 activation (Clemens et al., 2018a) – pIP10 is a male-only  
646 descending neuron (Philipsborn et al., 2011), but we don't yet know if it directly connects  
647 with pC2 neurons. The fact that song responses are bi-directional – pulse song can induce  
648 both slowing and acceleration within each sex (Fig. 2A, B, S3) – implies that the sex-  
649 specificity of motor control is more than a simple re-routing from accelerating DNs in males  
650 to slowing DNs in females. Notably, song also promotes copulation, but we did not detect a  
651 significant effect of pC2 inactivation on copulation rates (Fig. S6O). This could be because  
652 our driver only labeled 1/3 of the auditory pC2 neurons or because pC2 activity does not  
653 inform the decision to mate. That is, parallel pathways may control song responses on  
654 different timescales: one pathway accumulates song information over timescales of minutes  
655 (Clemens et al., 2015; Ratcliff et al., 2016) and ultimately controls the mating decision;  
656 another, independent pathway controls behavioral responses to song on sub-second  
657 timescales, such as dynamic adjustments in locomotion and the production of courtship  
658 song.

659

#### 660 ***Modularity facilitates plasticity of behavioral responses to song***

661 Our behavioral data suggest that some aspects of the sex-specificity of behavior arises after  
662 feature tuning. The pC2 neurons are selective for pulse song in both sexes (Fig. 3, 4) and  
663 drive locomotor responses with sex-specific dynamics or singing in males (Fig. 5). This is  
664 reminiscent of how sex-specific behaviors are driven to the male pheromone cVA in flies:  
665 shared detector neurons – olfactory receptor neurons and projection neurons in the antennal  
666 lobe – detect cVA in both sexes, and this information is then routed to sex-specific higher-  
667 order neurons in the lateral horn, which are thought to drive the different behaviors (Datta et  
668 al., 2008; Kohl et al., 2013; Ruta et al., 2010). This modular architecture with detectors of  
669 social signals being flexibly routed to different behavioral outputs is beneficial if these routes  
670 are plastic. For instance, here we show that social experience can shape male responses to  
671 song (similar to (Li et al., 2018)), along with tuning at the level of the neurons that detect the  
672 song (Fig. 6). During mating, males transfer a sex peptide to females (Yapici et al., 2008)  
673 that alters female behavioral responses to song from slowing to acceleration (Coen et al.,  
674 2014) – these effects may be mediated at the level of the motor circuits downstream of pC2,  
675 shifting pulse song responses in females to resemble those of males. Modularity also  
676 facilitates behavioral plasticity on evolutionary time scales since only one element – the  
677 feature detector – needs to change for behavioral tuning in both sexes to adapt to new  
678 songs that evolve during speciation (Capranica et al., 1973; Kostarakos et al., 2009). The



679 identification of pC2 neurons as pulse song detectors is therefore likely to benefit future  
680 studies of the evolution of song recognition.

681

682 ***pC2 neurons have a dual sensory and motor role***

683 Unlike regular higher-order sensory neurons, which detect a sensory cue to drive different  
684 behaviors, pC2 neurons detect the cue whose production they drive (Fig. 3F, G, 5A-C). Such  
685 a dual sensory and motor role may guide social interactions and communication via  
686 imitation. In *Drosophila melanogaster*, hearing the song of other males induces a male to  
687 court and sing to other females and even males (Eberl et al., 1997; Yoon et al., 2013). This  
688 behavior may have originated because the song of another male indicates the presence of a  
689 female nearby.

690

691 Neurons with a dual sensory and motor roles are well-known from vertebrates (Mooney,  
692 2014; Prather et al., 2008; Rizzolatti and Fogassi, 2014). For instance, “mirror” neurons are  
693 active during the production as well as the observation of a behavior and are thought to be  
694 crucial for imitation learning and communication between conspecifics (Rizzolatti and Arbib,  
695 1998). Neurons with a sensorimotor correspondence in the brain of song birds are active  
696 during singing and hearing song, and these neurons are hypothesized to play a role in song  
697 learning (Mooney, 2014). Importantly, pC2 differs crucially from these instances in that it  
698 directly drives the production of the acoustic signal it detects (Fig. 5A-C). Because we  
699 recorded pC2 activity in passively listening males, we do not yet know whether pC2 is  
700 activated by sound in an actively singing male. If so, hearing its own song could induce self-  
701 stimulation and form a positive feedback loop to maintain courtship behavior by mediating  
702 persistent behavioral state-changes (Hoopfer et al., 2016). Alternatively, auditory inputs  
703 could be suppressed during singing via a corollary discharge (Poulet and Hedwig, 2003;  
704 Schneider et al., 2014), which would allow pC2 to maintain sensitivity to the song of other  
705 males to coordinate inter-male competition during singing. Additional studies of pC2 activity  
706 in behaving animals are required to fully understand how these pulse song detector neurons  
707 integrate into the acoustic communication behavior.

708

709 In summary, we show how the circuits that recognize song to drive diverse and sex-specific  
710 behavioral responses are organized in *Drosophila*: common detector neurons – pC2 –  
711 recognize pulse song in both males and females, and this identically processed information  
712 is then routed to drive multiple sex-specific behaviors. Similar principles may underlie the



713 production of sex-specific behavioral responses to communication signals in other insects,  
714 song birds or mammals.

715

716 **Acknowledgements**: Isabel D'Allesandro for help with playback behavioral experiments,  
717 Alex Hammons and Nofar Ozeri-Engelhard for help with dissections for immunostaining,  
718 Diego Pacheco for help with aligning the volumetric GCaMP scans, Robert Court and Doug  
719 Armstrong (<http://www.virtualflybrain.org>) for help with brain registration, David Stern, Ben  
720 Arthur and Barry Dickson for discussions during the development of the FLYTRAP assay,  
721 Kai Feng and Barry Dickson for sharing the design of their playback assay chamber, Bruce  
722 Baker, Stephen Goodwin, Gerry Rubin, Peter Andolfatto for gifts of flies, and Kristin Scott,  
723 Asif Ghazanfar, Tim Buschman, and members of the Murthy lab for feedback on the  
724 manuscript.

725

726

727 **References**

- 728 Amézquita, A., Flechas, S.V., Lima, A.P., Gasser, H., Hödl, W., 2011. Acoustic interference  
729 and recognition space within a complex assemblage of dendrobatid frogs. *Proc Natl*  
730 *Acad Sci U S A* 108, 17058–17063. doi:10.1073/pnas.1104773108
- 731 Aranha, M.M., Herrmann, D., Cachitas, H., Neto-Silva, R.M., Dias, S., Vasconcelos, M.L.,  
732 2017. apterous Brain Neurons Control Receptivity to Male Courtship in *Drosophila*  
733 *Melanogaster* Females. *Sci Rep* 7, 46242. doi:10.1038/srep46242
- 734 Arthur, B.J., Sunayama-Morita, T., Coen, P., Murthy, M., Stern, D.L., 2013. Multi-channel  
735 acoustic recording and automated analysis of *Drosophila* courtship songs. *BMC Biol* 11,  
736 11. doi:10.1186/1741-7007-11-11
- 737 Azevedo, A.W., Wilson, R.I., 2017. Active Mechanisms of Vibration Encoding and Frequency  
738 Filtering in Central Mechanosensory Neurons. *Neuron* 1–25.  
739 doi:10.1016/j.neuron.2017.09.004
- 740 Bennet-Clark, H.C., Ewing, A.W., 1969. Pulse interval as a critical parameter in the courtship  
741 song of *Drosophila melanogaster*. *Animal Behaviour* 17, 755–759. doi:10.1016/S0003-  
742 3472(69)80023-0
- 743 Bennet-Clark, H.C., Ewing, A.W., 1967. Stimuli provided by Courtship of Male *Drosophila*  
744 *melanogaster*. *Nature* 215, 669–671. doi:10.1038/215669a0
- 745 Billeter, J.-C., Atallah, J., Krupp, J.J., Millar, J.G., Levine, J.D., 2009. Specialized cells tag  
746 sexual and species identity in *Drosophila melanogaster*. *Nature* 461, 987–991.  
747 doi:10.1038/nature08495
- 748 Billeter, J.-C., Levine, J.D., 2013. Who is he and what is he to you? Recognition in  
749 *Drosophila melanogaster*. *Current Opinion in Neurobiology* 23, 17–23.  
750 doi:10.1016/j.conb.2012.08.009
- 751 Bizley, J.K., Cohen, Y.E., 2013. The what, where and how of auditory-object perception.  
752 *Nature Reviews Neuroscience* 14, 693–707. doi:10.1038/nrn3565
- 753 Blankers, T., Hennig, R.M., Gray, D.A., 2015. Conservation of multivariate female  
754 preference functions and preference mechanisms in three species of trilling field  
755 crickets. *Journal of Evolutionary Biology* n/a–n/a. doi:10.1111/jeb.12599
- 756 Bussell, J.J., Yapici, N., Zhang, S.X., Dickson, B.J., Vosshall, L.B., 2014. Abdominal-B  
757 Neurons Control *Drosophila* Virgin Female Receptivity. *Current Biology* 24, 1584–1595.  
758 doi:10.1016/j.cub.2014.06.011
- 759 Cachero, S., Ostrovsky, A.D., Yu, J.Y., Dickson, B.J., Jefferis, G.S.X.E., 2010. Sexual  
760 dimorphism in the fly brain. *Current biology : CB* 20, 1589–1601.  
761 doi:10.1016/j.cub.2010.07.045
- 762 Cande, J., Berman, G.J., Namiki, S., Qiu, J., Korff, W., Card, G., Shaevitz, J.W., Stern, D.L.,  
763 2017. Optogenetic dissection of descending behavioral control in *Drosophila*. *bioRxiv* 1–  
764 50. doi:10.1101/230128
- 765 Capranica, R.R., Frishkopf, L.S., Nevo, E., 1973. Encoding of Geographic Dialects in the  
766 Auditory System of the Cricket Frog. *Science* 182, 1272–1275.  
767 doi:10.1126/science.182.4118.1272
- 768 Chen, T.-W., Wardill, T.J., Sun, Y., Pulver, S.R., Renninger, S.L., Baohan, A., Schreiter,  
769 E.R., Kerr, R.A., Orger, M.B., Jayaraman, V., Looger, L.L., Svoboda, K., Kim, D.S.,  
770 2013. Ultrasensitive fluorescent proteins for imaging neuronal activity. *Nature* 499, 295–  
771 300. doi:10.1038/nature12354
- 772 Clemens, J., Coen, P., Roemschied, F., Pereira, T., Mazumder, D., Pacheco, D., Murthy, M.,  
773 2017. Discovery of a new song mode in *Drosophila* reveals hidden structure in the  
774 sensory and neural drivers of behavior. *bioRxiv* 221044. doi:10.1101/221044
- 775 Clemens, J., Coen, P., Roemschied, F.A., Pereira, T.D., Mazumder, D., Aldarondo, D.E.,  
776 Pacheco, D.A., Murthy, M., 2018a. Discovery of a New Song Mode in *Drosophila*

- 777 Reveals Hidden Structure in the Sensory and Neural Drivers of Behavior. *Current*  
778 *Biology* 28, 2400–2412.e6. doi:10.1016/j.cub.2018.06.011
- 779 Clemens, J., Girardin, C.C., Coen, P., Guan, X.-J., Dickson, B.J., Murthy, M., 2015.  
780 Connecting Neural Codes with Behavior in the Auditory System of *Drosophila*. *Neuron*  
781 87, 1332–1343. doi:10.1016/j.neuron.2015.08.014
- 782 Clemens, J., Hennig, R.M., 2013. Computational principles underlying the recognition of  
783 acoustic signals in insects. *Journal of Computational Neuroscience* 35, 75–85.  
784 doi:10.1007/s10827-013-0441-0
- 785 Clemens, J., Ozeri-Engelhard, N., Murthy, M., 2018b. Fast intensity adaptation enhances the  
786 encoding of sound in *Drosophila*. *Nat Commun* 9, 134. doi:10.1038/s41467-017-02453-9
- 787 Clyne, J.D., Miesenböck, G., 2008. Sex-specific control and tuning of the pattern generator  
788 for courtship song in *Drosophila*. *Cell* 133, 354–363. doi:10.1016/j.cell.2008.01.050
- 789 Coen, P., Clemens, J., Weinstein, A.J., Pacheco, D.A., Deng, Y., Murthy, M., 2014. Dynamic  
790 sensory cues shape song structure in *Drosophila*. *Nature* 507, 233–237.  
791 doi:10.1038/nature13131
- 792 Coen, P., Xie, M., Clemens, J., Murthy, M., 2016. Sensorimotor Transformations Underlying  
793 Variability in Song Intensity during *Drosophila* Courtship. *Neuron* 89, 629–644.  
794 doi:10.1016/j.neuron.2015.12.035
- 795 Cook, R.M., 1973. Courtship processing in *Drosophila melanogaster*. II. An adaptation to  
796 selection for receptivity to wingless males. *Animal Behaviour* 21, 349–358.  
797 doi:10.1016/S0003-3472(73)80077-6
- 798 Crossley, S.A., Bennet-Clark, H.C., Evert, H.T., 1995. Courtship song components affect  
799 male and female *Drosophila* differently. *Animal Behaviour* 50, 827–839.  
800 doi:10.1016/0003-3472(95)80142-1
- 801 Datta, S.R., Vasconcelos, M.L., Ruta, V., Luo, S., Wong, A., Demir, E., Flores, J., Balonze,  
802 K., Dickson, B.J., Axel, R., 2008. The *Drosophila* pheromone cVA activates a sexually  
803 dimorphic neural circuit. *Nature* 452, 473–477. doi:10.1038/nature06808
- 804 Dicarlo, J.J., Zoccolan, D., Rust, N.C., 2012. How Does the Brain Solve Visual Object  
805 Recognition? *Neuron* 73, 415–434. doi:10.1016/j.neuron.2012.01.010
- 806 Dulac, C., Wagner, S., 2006. Genetic Analysis of Brain Circuits Underlying Pheromone  
807 Signaling. *Annu. Rev. Genet.* 40, 449–467.  
808 doi:10.1146/annurev.genet.39.073003.093937
- 809 Eberl, D.F., Duyk, G.M., Perrimon, N., 1997. A genetic screen for mutations that disrupt an  
810 auditory response in *Drosophila melanogaster*. *Proceedings of the National Academy of*  
811 *Sciences of the United States of America* 94, 14837–14842.  
812 doi:10.1146/annurev.neuro.20.1.567
- 813 Ellis, L.B., Kessler, S., 1975. Differential posteclosion housing experiences and reproduction  
814 in *Drosophila*. *Animal Behaviour* 23, 949–952. doi:10.1016/0003-3472(75)90119-0
- 815 Fan, P., Manoli, D.S., Ahmed, O.M., Chen, Y., Agarwal, N., Kwong, S., Cai, A.G., Neitz, J.,  
816 Renslo, A., Baker, B.S., Shah, N.M., 2013. Genetic and Neural Mechanisms that Inhibit  
817 *Drosophila* from Mating with Other Species. *Cell* 154, 89–102.  
818 doi:10.1016/j.cell.2013.06.008
- 819 Fortune, E.S., Rodríguez, C., Li, D., Ball, G.F., Coleman, M.J., 2011. Neural mechanisms for  
820 the coordination of duet singing in wrens. *Science* 334, 666–670.  
821 doi:10.1126/science.1209867
- 822 Gentner, T.Q., 2008. Temporal scales of auditory objects underlying birdsong vocal  
823 recognition. *The Journal of the Acoustical Society of America* 124, 1350–1359.  
824 doi:10.1121/1.2945705
- 825 Gentner, T.Q., Margoliash, D., 2003. Neuronal populations and single cells representing  
826 learned auditory objects. *Nature* 424, 669–674. doi:10.1038/nature01731

- 827 Gerhardt, C.H., Huber, F., 2002. Acoustic Communication in Insects and Anurans. University  
828 Of Chicago Press.
- 829 Griffiths, T.D., Warren, J.D., 2004. What is an auditory object? *Nature Reviews*  
830 *Neuroscience* 5, 887–892. doi:10.1038/nrn1538
- 831 Haga, S., Hattori, T., Sato, T., Sato, K., Matsuda, S., Kobayakawa, R., Sakano, H.,  
832 Yoshihara, Y., Kikusui, T., Touhara, K., 2010. The male mouse pheromone ESP1  
833 enhances female sexual receptive behaviour through a specific vomeronasal receptor.  
834 *Nature* 466, 118–122. doi:10.1038/nature09142
- 835 Helversen, von, D., Helversen, von, O., 1997. Recognition of sex in the acoustic  
836 communication of the grasshopper *Chorthippus biguttulus* (Orthoptera, Acrididae).  
837 *Journal of Comparative Physiology A: Neuroethology, Sensory, Neural, and Behavioral*  
838 *Physiology* 180, 373–386. doi:10.1007/s003590050056
- 839 Hennig, R.M., Blankers, T., Gray, D.A., 2016. Divergence in male cricket song and female  
840 preference functions in three allopatric sister species. *Journal of Comparative*  
841 *Physiology A: Neuroethology, Sensory, Neural, and Behavioral Physiology* 202, 347–  
842 360. doi:10.1007/s00359-016-1083-2
- 843 Hennig, R.M., Heller, K.-G., Clemens, J., 2014. Time and timing in the acoustic recognition  
844 system of crickets. *Frontiers in Physiology* 5. doi:10.3389/fphys.2014.00286
- 845 Hoopfer, E.D., Jung, Y., Inagaki, H.K., Rubin, G.M., Anderson, D.J., Ramaswami, M., 2016.  
846 P1 interneurons promote a persistent internal state that enhances inter-male aggression  
847 in *Drosophila*. *eLife* 4, e11346. doi:10.7554/eLife.11346
- 848 Ishii, K.K., Osakada, T., Mori, H., Miyasaka, N., Yoshihara, Y., Miyamichi, K., Touhara, K.,  
849 2017. A Labeled-Line Neural Circuit for Pheromone-Mediated Sexual Behaviors in Mice.  
850 *Neuron* 95, 123–137.e8. doi:10.1016/j.neuron.2017.05.038
- 851 Ishikawa, Y., Okamoto, N., Nakamura, M., Kim, H., Kamikouchi, A., 2017. Anatomic and  
852 Physiologic Heterogeneity of Subgroup-A Auditory Sensory Neurons in Fruit Flies. *Front.*  
853 *Neural Circuits* 11, 46. doi:10.3389/fncir.2017.00046
- 854 Ito, K., Shinomiya, K., Ito, M., Armstrong, J.D., Boyan, G., Hartenstein, V., Harzsch, S.,  
855 Heisenberg, M., Homberg, U., Jenett, A., Keshishian, H., Restifo, L.L., Rössler, W.,  
856 Simpson, J.H., Strausfeld, N.J., Strauss, R., Vosshall, L.B., 2014. A Systematic  
857 Nomenclature for the Insect Brain. *Neuron* 81, 755–765.  
858 doi:10.1016/j.neuron.2013.12.017
- 859 Jazayeri, M., Afraz, A., 2017. Navigating the Neural Space in Search of the Neural Code.  
860 *Neuron* 93, 1003–1014. doi:10.1016/j.neuron.2017.02.019
- 861 Kamikouchi, A., Inagaki, H.K., Effertz, T., Hendrich, O., Fiala, A., Göpfert, M.C., Ito, K.,  
862 2009. The neural basis of *Drosophila* gravity-sensing and hearing. *Nature* 458, 165–171.  
863 doi:10.1038/nature07810
- 864 Keleman, K., Vrontou, E., Krüttner, S., Yu, J.Y., Kurtovic-Kozaric, A., Dickson, B.J., 2012.  
865 Dopamine neurons modulate pheromone responses in *Drosophila* courtship learning.  
866 *Nature*. doi:10.1038/nature11345
- 867 Kelley, D.B., 2003. Sexually Dimorphic Behaviors.  
868 <http://dx.doi.org/10.1146/annurev.ne.11.030188.001301> 11, 225–251.
- 869 Kimura, K.-I., Sato, C., Koganezawa, M., Yamamoto, D., 2015. *Drosophila* Ovipositor  
870 Extension in Mating Behavior and Egg Deposition Involves Distinct Sets of Brain  
871 Interneurons. *PLoS ONE* 10, e0126445. doi:10.1371/journal.pone.0126445
- 872 Klapoetke, N.C., Murata, Y., Kim, S.S., Pulver, S.R., Birdsey-Benson, A., Cho, Y.K.,  
873 Morimoto, T.K., Chuong, A.S., Carpenter, E.J., Tian, Z., Wang, J., Xie, Y., Yan, Z.,  
874 Zhang, Y., Chow, B.Y., Surek, B., Melkonian, M., Jayaraman, V., Constantine-Paton, M.,  
875 Wong, G.K.-S., Boyden, E.S., 2014. Independent optical excitation of distinct neural  
876 populations. *Nat. Methods* 11, 338–346. doi:10.1038/nmeth.2836

- 877 Koganezawa, M., Kimura, K.-I., Yamamoto, D., 2016. The Neural Circuitry that Functions as  
878 a Switch for Courtship versus Aggression in *Drosophila* Males. *Current Biology* 26,  
879 1395–1403. doi:10.1016/j.cub.2016.04.017
- 880 Kohatsu, S., Koganezawa, M., Yamamoto, D., 2011. Female contact activates male-specific  
881 interneurons that trigger stereotypic courtship behavior in *Drosophila*. *Neuron* 69, 498–  
882 508. doi:10.1016/j.neuron.2010.12.017
- 883 Kohatsu, S., Yamamoto, D., 2015. Visually induced initiation of *Drosophila* innate courtship-  
884 like following pursuit is mediated by central excitatory state. *Nat Commun* 6, 6457.  
885 doi:10.1038/ncomms7457
- 886 Kohl, J., Ostrovsky, A.D., Frechter, S., Jefferis, G.S.X.E., 2013. A Bidirectional Circuit Switch  
887 Reroutes Pheromone Signals in Male and Female Brains. *Cell* 155, 1610–1623.  
888 doi:10.1016/j.cell.2013.11.025
- 889 Konishi, M., 1985. Birdsong: From Behavior to Neuron. *Annu. Rev. Neurosci.* 8, 125–170.  
890 doi:10.1146/annurev.neuro.8.1.125
- 891 Kostarakos, K., Hennig, M.R., Römer, H., 2009. Two matched filters and the evolution of  
892 mating signals in four species of cricket. *Frontiers in Zoology* 6, 22. doi:10.1186/1742-  
893 9994-6-22
- 894 Kurtovic, A., Widmer, A., Dickson, B.J., 2007. A single class of olfactory neurons mediates  
895 behavioural responses to a *Drosophila* sex pheromone. *Nature* 446, 542–546.  
896 doi:10.1038/nature05672
- 897 Lehnert, B.P., Baker, A.E., Gaudry, Q., Chiang, A.-S., Wilson, R.I., 2013. Distinct Roles of  
898 TRP Channels in Auditory Transduction and Amplification in *Drosophila*. *Neuron* 77,  
899 115–128. doi:10.1016/j.neuron.2012.11.030
- 900 Li, X., Ishimoto, H., Kamikouchi, A., 2018. Auditory experience controls the maturation of  
901 song discrimination and sexual response in *Drosophila*. *eLife* 7, e34348.  
902 doi:10.7554/eLife.34348
- 903 Marlin, B.J., Mitre, M., D'Amour, J.A., Chao, M.V., Froemke, R.C., 2015. Oxytocin enables  
904 maternal behaviour by balancing cortical inhibition. *Nature* 520, 499–504.  
905 doi:10.1038/nature14402
- 906 Mooney, R., 2014. Auditory–vocal mirroring in songbirds. *Philosophical Transactions of the*  
907 *Royal Society B: Biological Sciences* 369, 20130179–399. doi:10.1098/rstb.2013.0179
- 908 Nagel, K.I., Wilson, R.I., 2011. Biophysical mechanisms underlying olfactory receptor neuron  
909 dynamics. *Nature neuroscience* 14, 208–216. doi:10.1038/nn.2725
- 910 Namiki, S., Dickinson, M.H., Wong, A.M., Korff, W., Card, G.M., 2017. The functional  
911 organization of descending sensory-motor pathways in *Drosophila*. bioRxiv 231696.  
912 doi:10.1101/231696
- 913 Nern, A., Pfeiffer, B.D., Rubin, G.M., 2015. Optimized tools for multicolor stochastic labeling  
914 reveal diverse stereotyped cell arrangements in the fly visual system. *Proc Natl Acad Sci*  
915 *U S A* 112, E2967–76. doi:10.1073/pnas.1506763112
- 916 Pan, Y., Meissner, G.W., Baker, B.S., 2012. Joint control of *Drosophila* male courtship  
917 behavior by motion cues and activation of male-specific P1 neurons. *Proc Natl Acad Sci*  
918 *U S A* 109, 10065–10070. doi:10.1073/pnas.1207107109
- 919 Patella, P., Wilson, R.I., 2018. Functional Maps of Mechanosensory Features in the  
920 *Drosophila* Brain. *Current Biology* 0. doi:10.1016/j.cub.2018.02.074
- 921 Philipsborn, von, A.C., Liu, T., Yu, J.Y., Masser, C., Bidaye, S.S., Dickson, B.J., 2011.  
922 Neuronal control of *Drosophila* courtship song. *Neuron* 69, 509–522.  
923 doi:10.1016/j.neuron.2011.01.011
- 924 Poulet, J.F.A., Hedwig, B., 2003. Corollary discharge inhibition of ascending auditory  
925 neurons in the stridulating cricket. *The Journal of neuroscience : the official journal of*  
926 *the Society for Neuroscience* 23, 4717–4725.



- 927 Prather, J.F., Peters, S., Nowicki, S., Mooney, R., 2008. Precise auditory–vocal mirroring in  
928 neurons for learned vocal communication. *Nature* 451, 305–310.  
929 doi:10.1038/nature06492
- 930 Ratcliff, R., Smith, P.L., Brown, S.D., McKoon, G., 2016. Diffusion Decision Model: Current  
931 Issues and History. *Trends Cogn. Sci. (Regul. Ed.)* 20, 260–281.  
932 doi:10.1016/j.tics.2016.01.007
- 933 Remedios, R., Kennedy, A., Zelikowsky, M., Grewe, B.F., Schnitzer, M.J., Anderson, D.J.,  
934 2017. Social behaviour shapes hypothalamic neural ensemble representations of  
935 conspecific sex. *Nature* 550, 388–392. doi:10.1038/nature23885
- 936 Rezával, C., Pattnaik, S., Pavlou, H.J., Nojima, T., Brüggemeier, B., D’Souza, L.A.D.,  
937 Dweck, H.K.M., Goodwin, S.F., 2016. Activation of Latent Courtship Circuitry in the  
938 Brain of *Drosophila* Females Induces Male-like Behaviors. *Current Biology* 26, 2508–  
939 2515. doi:10.1016/j.cub.2016.07.021
- 940 Riabinina, O., Dai, M., Duke, T., Albert, J.T., 2011. Active process mediates species-specific  
941 tuning of *Drosophila* ears. *Current biology* : CB 21, 658–664.  
942 doi:10.1016/j.cub.2011.03.001
- 943 Rideout, E.J., Dornan, A.J., Neville, M.C., Eadie, S., Goodwin, S.F., 2010. Control of sexual  
944 differentiation and behavior by the doublesex gene in *Drosophila melanogaster*. *Nature*  
945 *neuroscience* 13, 458–466. doi:10.1038/nn.2515
- 946 Rizzolatti, G., Arbib, M.A., 1998. Language within our grasp. *Trends in Neurosciences* 21,  
947 188–194. doi:10.1016/S0166-2236(98)01260-0
- 948 Rizzolatti, G., Fogassi, L., 2014. The mirror mechanism: recent findings and perspectives.  
949 *Philosophical Transactions of the Royal Society B: Biological Sciences* 369, 20130420–  
950 20130420. doi:10.1098/rstb.2013.0420
- 951 Robinett, C.C., Vaughan, A.G., Knapp, J.M., Baker, B.S., 2010. Sex and the single cell. II.  
952 There is a time and place for sex. *PLoS Biology* 8, e1000365.  
953 doi:10.1371/journal.pbio.1000365.g009
- 954 Ronacher, B., Ronacher, B., Hennig, R.M., Clemens, J., 2014. Computational principles  
955 underlying recognition of acoustic signals in grasshoppers and crickets. *J Comp Physiol*  
956 *A* 201, 61–71. doi:10.1007/s00359-014-0946-7
- 957 Rosenthal, G.G., Ryan, M.J., 2011. Conflicting preferences within females: sexual selection  
958 versus species recognition. *Biol. Lett.* 7, 525–527. doi:10.1098/rsbl.2011.0027
- 959 Ruta, V., Datta, S.R., Vasconcelos, M.L., Freeland, J., Looger, L.L., Axel, R., 2010. A  
960 dimorphic pheromone circuit in *Drosophila* from sensory input to descending output.  
961 *Nature* 468, 686–690. doi:10.1038/nature09554
- 962 Ryan, M.J., Cummings, M.E., 2013. Perceptual Biases and Mate Choice. *Annu. Rev. Ecol.*  
963 *Evol. Syst.* 44, 437–459. doi:10.1146/annurev-ecolsys-110512-135901
- 964 Ryan, M.J., Phelps, S.M., Rand, A.S., 2001. How evolutionary history shapes recognition  
965 mechanisms. *Trends Cogn. Sci. (Regul. Ed.)* 5, 143–148.
- 966 Rybak, F., Aubin, T., Moulin, B., Jallon, J.-M., 2002a. Acoustic communication in *Drosophila*  
967 *melanogaster* courtship: Are pulse-and sine-song frequencies important for courtship  
968 success? *Canadian journal of zoology* 80, 987–996.
- 969 Rybak, F., Sureau, G., Aubin, T., 2002b. Functional coupling of acoustic and chemical  
970 signals in the courtship behaviour of the male *Drosophila melanogaster*. *Proc. R. Soc. B*  
971 269, 695–701. doi:10.1098/rspb.2001.1919
- 972 Schilcher, F.V., 1976. The function of pulse song and sine song in the courtship of  
973 *Drosophila melanogaster*. *Animal Behaviour* 24, 622–625.
- 974 Schilcher, Von, F., 1976. The role of auditory stimuli in the courtship of *Drosophila*  
975 *melanogaster*. *Animal Behaviour* 24, 18–26. doi:10.1016/S0003-3472(76)80095-4
- 976 Schneider, D.M., Nelson, A., Mooney, R., 2014. A synaptic and circuit basis for corollary  
977 discharge in the auditory cortex. *Nature*. doi:10.1038/nature13724

- 978 Schöneich, S., Kostarakos, K., Hedwig, B., 2015. An auditory feature detection circuit for  
979 sound pattern recognition. *Science Advances* 1, e1500325–e1500325.  
980 doi:10.1126/sciadv.1500325
- 981 Shirangi, T.R., Stern, D.L., Truman, J.W., 2013. Motor control of *Drosophila* courtship song.  
982 *Cell Reports* 5, 678–686. doi:10.1016/j.celrep.2013.09.039
- 983 Stowers, L., Logan, D.W., 2010. Sexual dimorphism in olfactory signaling. *Current Opinion in*  
984 *Neurobiology* 20, 770–775. doi:10.1016/j.conb.2010.08.015
- 985 Sweeney, S.T., Broadie, K., Keane, J., Niemann, H., O'Kane, C.J., 1995. Targeted  
986 expression of tetanus toxin light chain in *Drosophila* specifically eliminates synaptic  
987 transmission and causes behavioral defects. *Neuron* 14, 341–351. doi:10.1016/0896-  
988 6273(95)90290-2
- 989 Talyn, B.C., Dowse, H.B., 2004. The role of courtship song in sexual selection and species  
990 recognition by female *Drosophila melanogaster*. *Animal Behaviour* 68, 1165–1180.  
991 doi:10.1016/j.anbehav.2003.11.023
- 992 Tinbergen, N., 1989. *The Study of Instinct*. Oxford University Press.
- 993 Tompkins, L., Gross, A.C., Hall, J.C., Gailey, D.A., Siegel, R.W., 1982. The role of female  
994 movement in the sexual behavior of *Drosophila melanogaster*. *Behav Genet* 12, 295–  
995 307. doi:10.1007/BF01067849
- 996 Tsao, D.Y., Livingstone, M.S., 2008. Mechanisms of Face Perception. *Annu. Rev. Neurosci.*  
997 31, 411–437. doi:10.1146/annurev.neuro.30.051606.094238
- 998 Vaughan, A.G., Zhou, C., Manoli, D.S., Baker, B.S., 2014. Neural Pathways for the  
999 Detection and Discrimination of Conspecific Song in *D. melanogaster*. *Current Biology*.  
1000 doi:10.1016/j.cub.2014.03.048
- 1001 Versteven, M., Vanden Broeck, L., Geurten, B., Zwarts, L., Decraecker, L., Beelen, M.,  
1002 Göpfert, M.C., Heinrich, R., Callaerts, P., 2017. Hearing regulates *Drosophila*  
1003 aggression. *Proc Natl Acad Sci U S A* 114, 1958–1963. doi:10.1073/pnas.1605946114
- 1004 Wang, L., Anderson, D.J., 2010. Identification of an aggression-promoting pheromone and  
1005 its receptor neurons in *Drosophila*. *Nature* 463, 227–231. doi:10.1038/nature08678
- 1006 Yamada, D., Ishimoto, H., Li, X., Kohashi, T., Ishikawa, Y., Kamikouchi, A., 2018.  
1007 GABAergic Local Interneurons Shape Female Fruit Fly Response to Mating Songs. *J.*  
1008 *Neurosci.* 38, 4329–4347. doi:10.1523/JNEUROSCI.3644-17.2018
- 1009 Yamamoto, D., Yamamoto, D., Koganezawa, M., Koganezawa, M., 2013. Genes and circuits  
1010 of courtship behaviour in *Drosophila* males. *Nature Reviews Neuroscience* 14, 681–692.  
1011 doi:10.1038/nrn3567
- 1012 Yang, C.F., Shah, N.M., 2014. Representing Sex in the Brain, One Module at a Time.  
1013 *Neuron* 82, 261–278. doi:10.1016/j.neuron.2014.03.029
- 1014 Yapici, N., Kim, Y.J., Ribeiro, C., Dickson, B.J., 2008. A receptor that mediates the post-  
1015 mating switch in *Drosophila* reproductive behaviour. *Nature*.
- 1016 Yoon, J., Matsuo, E., Yamada, D., Mizuno, H., Morimoto, T., Miyakawa, H., Kinoshita, S.,  
1017 Ishimoto, H., Kamikouchi, A., 2013. Selectivity and Plasticity in a Sound-Evoked Male-  
1018 Male Interaction in *Drosophila*. *PLoS ONE* 8, e74289. doi:10.1371/journal.pone.0074289
- 1019 Yorozu, S., Wong, A., Fischer, B.J., Dankert, H., Kernan, M.J., Kamikouchi, A., Ito, K.,  
1020 Anderson, D.J., 2009. Distinct sensory representations of wind and near-field sound in  
1021 the *Drosophila* brain. *Nature* 458, 201–205. doi:10.1038/nature07843
- 1022 Yu, J.Y., Kanai, M.I., Demir, E., Jefferis, G.S.X.E., Dickson, B.J., 2010. Cellular organization  
1023 of the neural circuit that drives *Drosophila* courtship behavior. *Current biology : CB* 20,  
1024 1602–1614. doi:10.1016/j.cub.2010.08.025
- 1025 Zhang, S.X., Rogulja, D., Crickmore, M.A., 2016. Dopaminergic Circuitry Underlying Mating  
1026 Drive. *Neuron* 91, 168–181. doi:10.1016/j.neuron.2016.05.020



- 1027 Zhou, C., Franconville, R., Vaughan, A.G., Robinett, C.C., Jayaraman, V., Baker, B.S., 2015.  
1028 Central neural circuitry mediating courtship song perception in male *Drosophila*. *eLife* 4,  
1029 11. doi:10.7554/eLife.08477  
1030 Zhou, C., Pan, Y., Robinett, C.C., Meissner, G.W., Baker, B.S., 2014. Central Brain Neurons  
1031 Expressing doublesex Regulate Female Receptivity in *Drosophila*. *Neuron* 83, 149–163.  
1032 doi:10.1016/j.neuron.2014.05.038  
1033

**Figure 1**

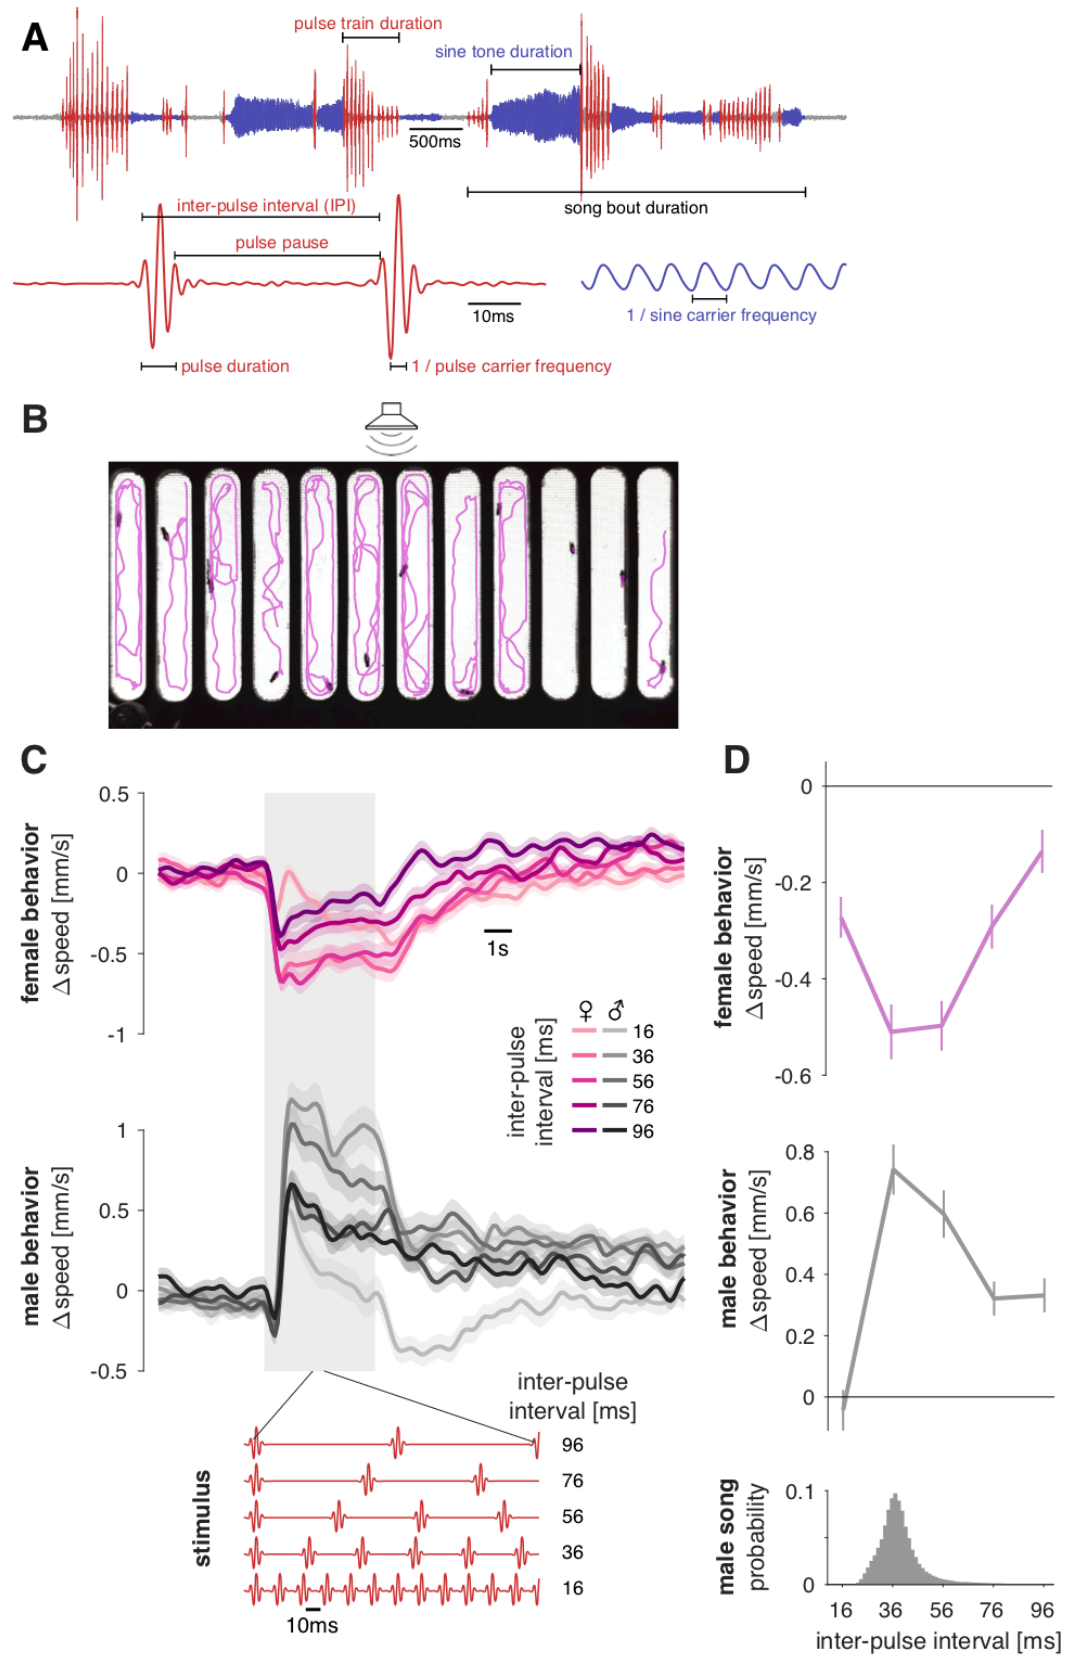

**Figure 1 – FLyTRAP assay for comparing locomotor tuning for courtship song stimuli in males and females.**

**A** *Drosophila melanogaster* produces song in bouts that can consist of two modes: Sine song corresponds to a weakly amplitude modulated oscillation with a species-specific carrier frequency (~150Hz) and pulse song corresponds to trains of Gabor-like wavelets each with a carrier frequency between 220 and 450Hz and a duration between 6 and 12 ms. These pulses are produced at an inter-pulse interval (IPI) of 30-45 ms.

**B** FLyTRAP consists of behavioral chamber that is placed in front of a speaker through which sound is presented. Fly movement is tracked using a camera. Shown is a single video frame of females in the assay with fly tracks for the preceding 20 seconds overlaid in magenta. See Movie S1.

**C** Locomotor responses of females (magenta) and males (grey) for pulse trains with different IPIs (see legend). The gray shaded box indicates the duration of the sound stimulus. Red traces at the bottom of the plot show short snippets of the 5 IPI stimuli presented in this experiment. Baseline speed was subtracted before trial averaging.

**D** Speed tuning curves for different IPIs in females (magenta) and males (grey) are obtained by averaging the speed traces in the six seconds following stimulus onset. The histograms at bottom shows the IPI distribution found in male song (data from 47 males of NM91 wild type strain totaling 82643 pulses).

Lines and shaded areas or error bars in C and D correspond to the mean  $\pm$  s.e.m. across 112 male and 112 female flies.

All  $\Delta$ speed values from the wild type strain NM91.

See also Figure S1 and Movie S1.

**Figure 2**

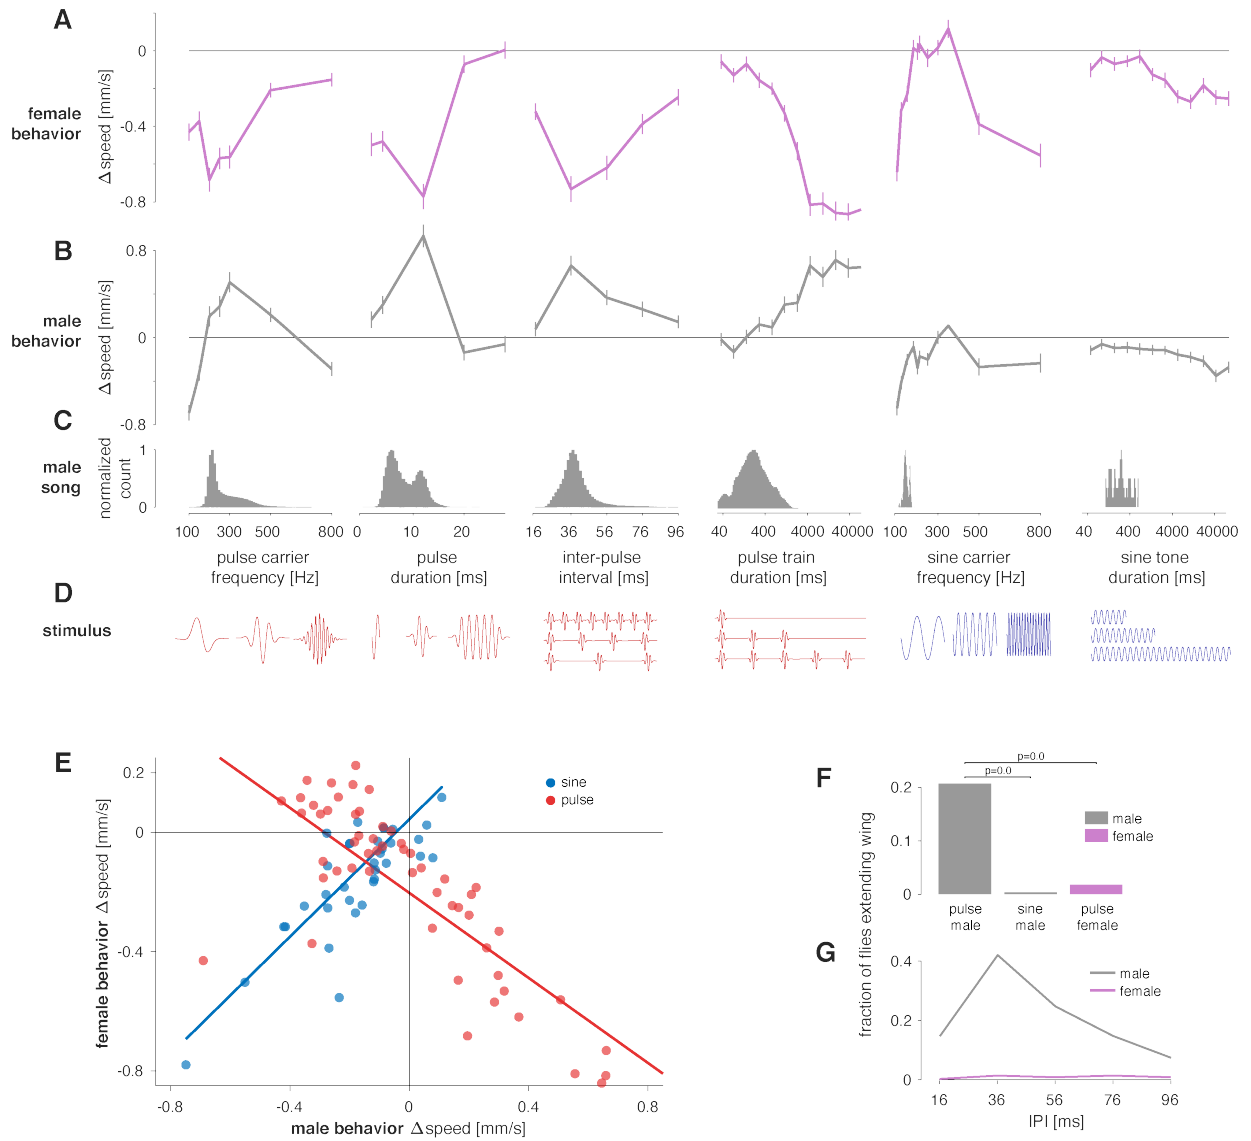

**Figure 2 – Responses to song playback are sex-specific and tuned for multiple features of pulse and sine song.**

**A, B** Locomotor tuning curves for females (A, magenta) and males (B, grey) for 6 different features of pulse and sine song. Lines and error bars correspond to the mean $\pm$ s.e.m. across flies (see Table S1 for a description of all stimuli and N flies).

**C** Distribution of the six different song features tested in A, B in the natural courtship song of *Drosophila melanogaster* males (data from 47 males of NM91 wild type strain totaling 82643 pulses and 51 minutes of sine song from 5269 song bouts). Histograms are normalized to a maximum of 1.0.

**D** Pictograms (not to scale) illustrating each song feature examined in A-C. Pulse and sine song features are marked red and blue, respectively.

**E** Changes in speed for males and females for all pulse (red) and sine (blue) stimuli tested (data from A, B, S3, see Table S1). Responses to sine stimuli are strongly and positively correlated between sexes ( $r=0.89$ ,  $p=6\times 10^{-8}$ ). Pulse responses are also strongly but negatively correlated ( $r=-0.63$ ,  $p=5\times 10^{-10}$ ). Blue and red lines correspond to linear fits to the responses to sine and pulse song, respectively.

**F** Fraction of trials for which male and female flies extended their wings during the playback of pulse song (five different IPIs as in 1C, D) and sine song (150Hz, quantified only for males). Solitary males (grey) frequently extend their wings in response to pulse but not to sine song. Solitary females (magenta) do not extend wings for pulse song. See also Movie S2.

**G** Fraction of trials that evoke wing extension in males (grey) and females (magenta) as a function of IPI. In males, wing extension and locomotor behavior (Figure 1D) exhibit strikingly similar tuning with a peak at the conspecific IPI. Females almost never extend their wing for any IPI.

All behavioral data from the wild type strain NM91. All correlation values are Spearman's rank correlation.

See also Figures S2, S3 and Movie S2.

**Figure 3**

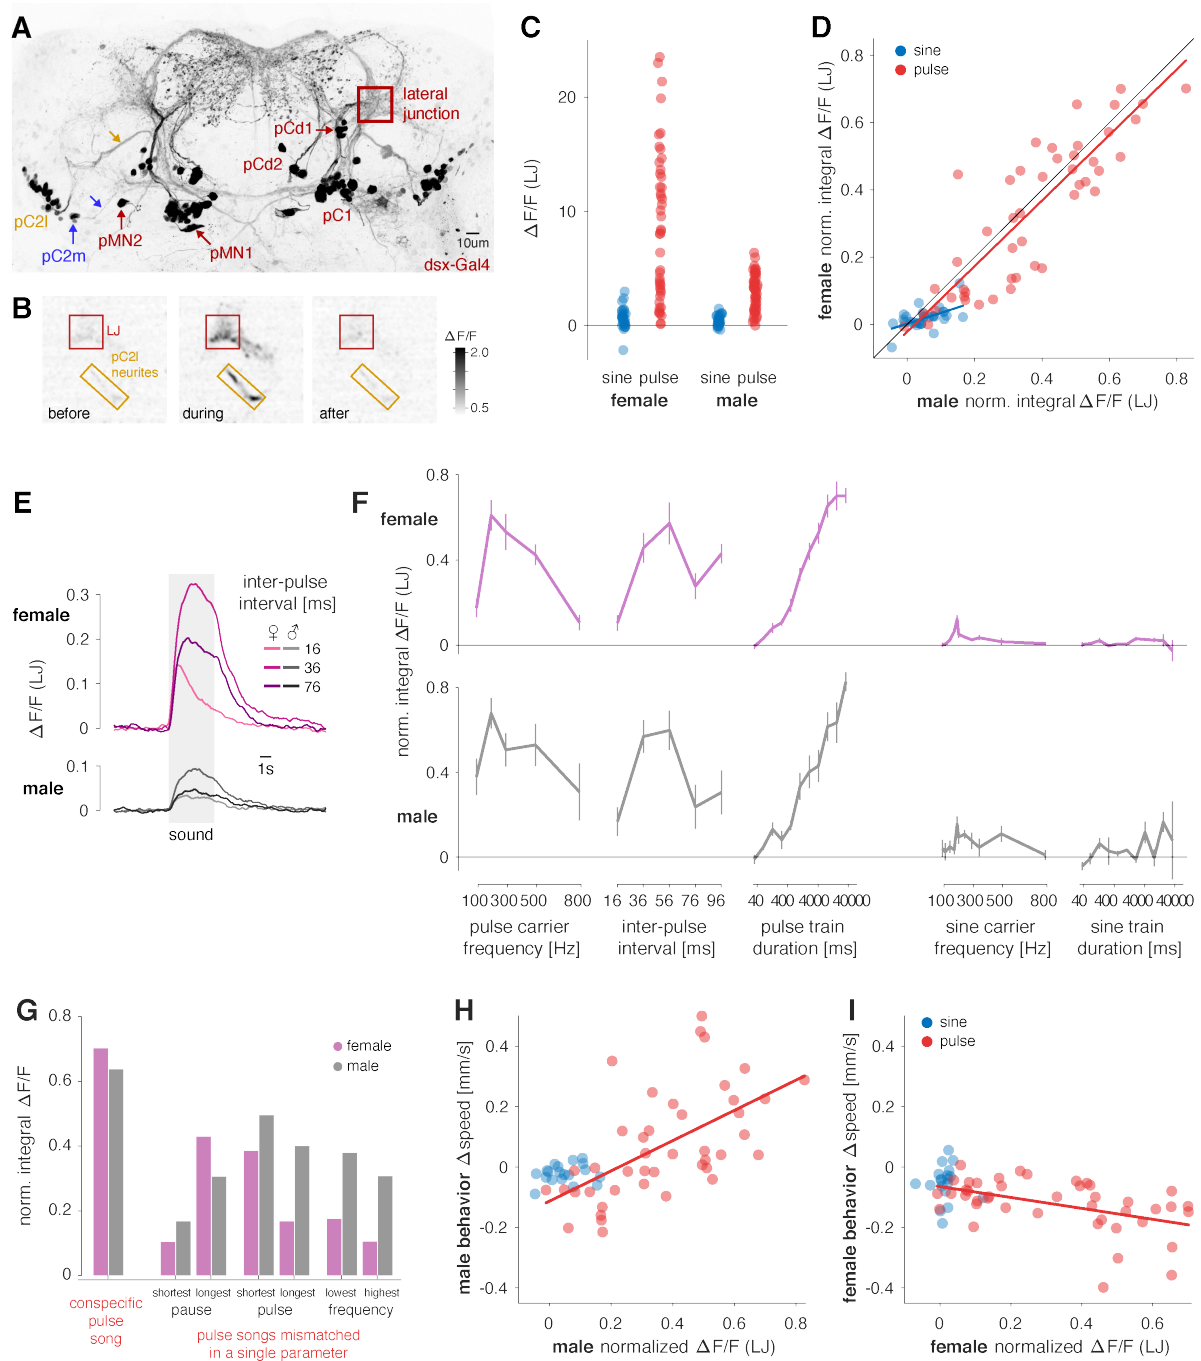

**Figure 3 – Neuronal tuning of Dsx+ neurons in the LJ matches behavioral tuning for pulse stimuli in males and females.**

**A** Anatomy of Dsx+ neurons in the female brain. Max z-projection of a confocal stack of a fly brain in which all Dsx+ are labeled with GFP. 5/8 cell types (pC1, pC2l (yellow), pC2m (blue), pMN1, pMN2) project to the lateral junction (LJ), while 3 cell types (pCd1, pCd2, aDN (movie S11)) do not. Yellow and blue arrows point to the neurites that connect pC2l and pC2m to the LJ. See also Fig. S5B, C.

**B** Grayscale image (see color bar) of calcium responses ( $\Delta F/F$ ) to a pulse train (IPI 36ms) in an ROI centered around the LJ (red) and the pC2l neurites (yellow) in a female. Shown are snapshots of the recording at three different time points relative to stimulus onset - before ( $T=-10s$ ), during ( $T=1.2s$ ), and after ( $T=20s$ ) the stimulus. Flies express GCaMP6m in all Dsx+ cells. Conspecific pulse song elicits strong increases in fluorescence in the LJ and the pC2 neurites.

**C** LJ responses to sine (blue) and pulses (red) stimuli in females (left) and males (right). Individual dots correspond to integral  $\Delta F/F$  responses for individual stimuli averaged over the 3-12 individuals tested for each stimulus. Many pulse stimuli evoke much stronger responses than the most effective sine stimulus ( $p=8 \times 10^{-11}$  for females and  $p=2 \times 10^{-11}$  for males, two-sided rank sum comparison of sine and pulse responses).

**D** Comparison of male and female LJ responses to sine (blue) and pulse (red) stimuli. Responses to both song modes are correlated strongly for pulse ( $r=0.85$ ,  $p=1 \times 10^{-14}$ ) and moderately for sine ( $r=0.48$ ,  $p=0.007$ ) stimuli. Individual dots correspond to the integral  $\Delta F/F$  for individual stimuli averaged across animals. Before averaging, the responses of each animal were normalized to compensate for inter-individual differences in calcium levels (see methods for details).

**E** Fluorescence traces from the LJ in females (top, magenta) and males (bottom, grey) for pulse trains with three different IPIs (see legend, average over 6 individuals for each sex). In both sexes, the LJ responds most strongly to the conspecific IPI of 36ms (Fig. 1D). Responses are much weaker for shorter (16ms) and longer (76ms) IPIs. Calcium responses in the LJ are smaller in males than in females (compare C). See also Supp. Movie S3, S4.

**F** Tuning curves of calcium responses in the female (magenta) and the male (gray) LJ for features of pulse and sine song (compare to behavioral tuning in Fig. 2A, B). Lines and error bars correspond to the mean  $\pm$  s.e.m. across flies. Integral  $\Delta F/F$  normalized as in D.

**G** pC2 calcium responses to the conspecific pulse song (left), pulse song stimuli with a mismatch in a single feature (right) in males (grey) and females (magenta). A single mismatch reduces neuronal responses by at least 20% and up to 80%, indicating the high, multi-feature selectivity of pC2 in both sexes. The conspecific pulse song is shown as a reference (pulse duration 12ms, pulse pause 24ms, pulse carrier frequency 250Hz, 112 pulses). Mismatch stimuli differed only in a single parameter from the reference (shortest pause: 4 ms, longest pause: 84 ms; shortest pulse: 4ms, longest pulse: 60ms, lowest frequency: 100Hz, highest frequency: 800Hz).

**H, I** Comparison of behavioral and neuronal tuning in males (H) and females (I). Behavioral and neuronal data from flies of the same genotype (Dsx/GCaMP). We obtained similar results when comparing the neuronal responses to behavioral data from wild type flies (NM91, Fig. S4H-I).



Dots correspond to the  $\Delta\text{speed}$  and the normalized integral  $\Delta F/F$  averaged over individuals, lines indicate linear fits. In males (H), behavioral and neuronal responses are *positively* correlated for pulse (red,  $r=0.61$ ,  $p=1 \times 10^{-5}$ ) but not for sine stimuli (blue,  $r=0.17$ ,  $p=0.49$ ). In females (I), behavioral and neuronal responses are *negatively* correlated for pulse (red,  $r=-0.53$ ,  $p=3 \times 10^{-4}$ ) but not for sine stimuli (blue,  $r=0.28$ ,  $p=0.25$ ).

All  $\Delta\text{speed}$  and  $\Delta F/F$  values are from Dsx/GCaMP flies. Panel K additionally shows behavioral data from the wild type strain NM91. All correlation values are Spearman's rank correlation. See also Figure S4, and Movie S3 and S4.

**Figure 4**

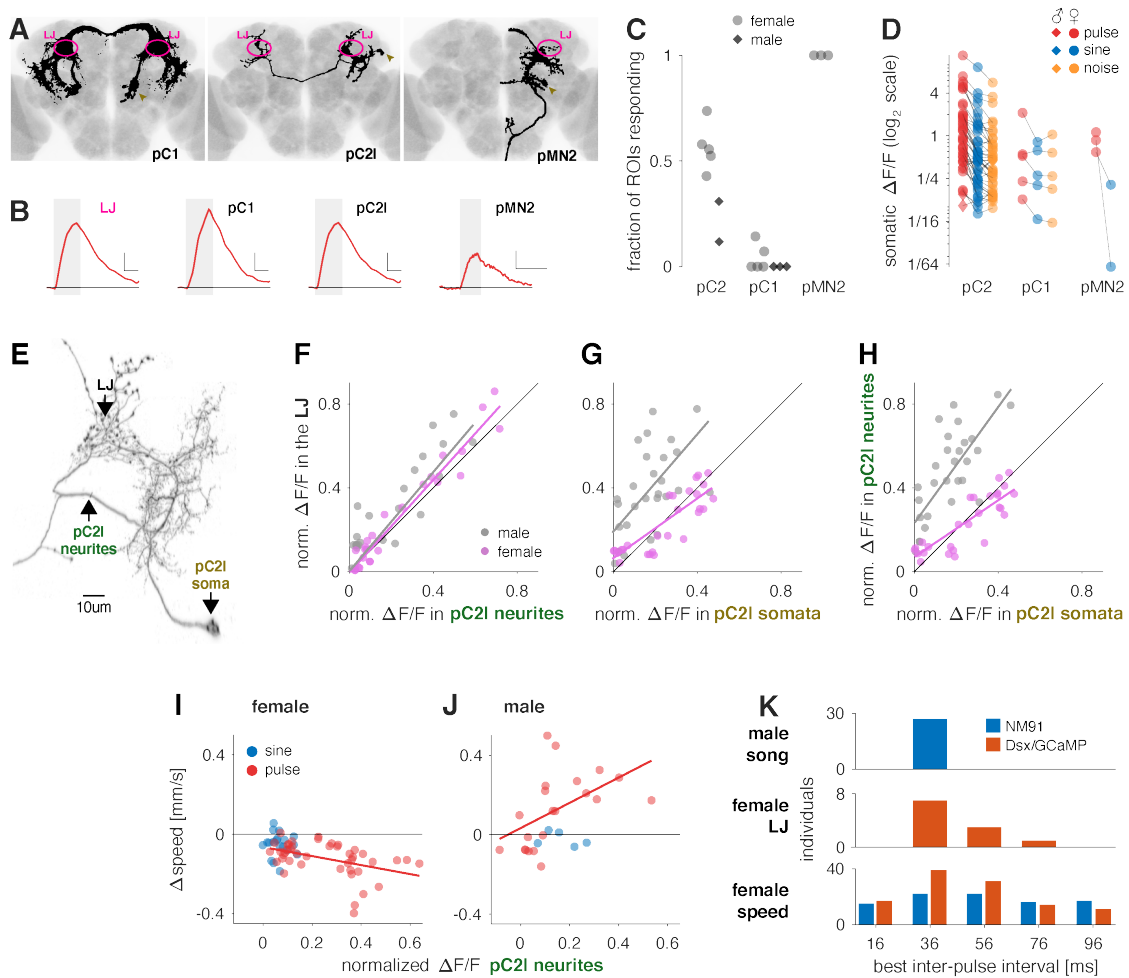

**Figure 4 – pC2 neurons are pulse song detectors common to both sexes.**

**A** Individual Dsx+ neuron types (black) with somas in the female central brain in which we detected calcium responses for pulse or sine song, registered to a common template brain (gray) (see Methods for details). Of the 8 Dsx+ cell types in the central brain, pC2l, pC2m, the single female-only neuron pMN2 and a small number of pC1 neurons (and only in some individuals) respond to courtship sounds. The lateral junction (LJ) is marked in magenta and somata are marked with golden arrow heads. See also Supp. Movie S10, S11.

**B** Example somatic fluorescence traces from single somata of the pC1, pC2, and pMN2 cells in response to pulse trains (IPI=36ms, single trial responses). Fluorescence trace from the LJ (magenta) shown for comparison. The gray box marks the duration of the sound stimulus. In each panel. Horizontal and vertical scale bars correspond to 6 seconds and 0.25  $\Delta F/F$ , respectively. Horizontal black line marks  $\Delta F/F=0$ .

**C** Fraction of cells in Dsx+ clusters with detectable somatic calcium responses to pulse or sine song (females, light grey dots; males, dark grey squares). Complete clusters were imaged using volumetric scan for pC1, pC2 and single plane scans for pMN2. We did not distinguish between pC2l/m, since in most flies both groups are spatially intermingled at the level of cell bodies. Note that all flies included showed calcium responses to sound in the LJ, even when we did not detect responses in specific somata.

**D** Peak somatic  $\Delta F/F$  for pulse (red, 36ms IPI), sine (blue, 150Hz), and noise (orange, 100-900Hz). Lines connect responses recorded in the same animal. Note that responses are plotted on a log scale – the average of the ratio between sine and pulse for all cells is  $\sim 2.6$ . 36/38 pC2, 4/5 pC1 and 2/2 pMN2 prefer pulse over sine. See also Supp. Movie S5, S6.

**E** High resolution confocal scan of a single pC2l neuron (obtained via a stochastic labelling technique, see Methods for details). Only the side ipsilateral to the cell body is shown. The neurites in the lateral junction appear varicose, indicating that they contain pre-synaptic sites.

**F** Normalized integral  $\Delta F/F$  values recorded simultaneously in the LJ and the neurites that connect the LJ with the somata of pC2l (and no other Dsx+ cell type) are highly correlated in females (magenta,  $r=0.99$ ,  $p=1 \times 10^{-71}$ ,  $N=10-24$  flies/stimulus) and males (grey,  $r=0.75$ ,  $p=4 \times 10^{-13}$ ,  $N=1-6$  flies/stimulus). Each point corresponds to an individual stimulus (pulse or sine) averaged over flies. The high correlation indicates that calcium responses in the LJ reflect responses in pC2l neurons. Magenta and gray lines in F-H correspond to a least-squares fit to the individual data points.

**G** Normalized integral  $\Delta F/F$  recorded first in the LJ and then in single pC2l somata in the same fly are highly correlated in both sexes (females:  $r=0.86$ ,  $p=8 \times 10^{-10}$ ,  $N=8$  flies/stimulus, males:  $r=0.73$ ,  $p=4 \times 10^{-6}$ ,  $N=1$  fly/stimulus), demonstrating that calcium responses in the LJ represent the responses of individual pC2l cells, with some variability across individual cells and animals.

**H** Normalized integral  $\Delta F/F$  responses from the pC2l neurites and from single pC2l somata in different flies are highly correlated in both sexes (females:  $r=0.89$ ,  $p=2 \times 10^{-11}$ ,  $N=8$  flies/stimulus, males:  $r=0.79$ ,  $p=1 \times 10^{-7}$ ,  $N=1$  fly/stimulus). The pC2l neurites reflect the average activity of individual pC2l neurons, with some variability across individual cells and animals.

**I, J** Comparison of calcium responses in the pC2l neurites and male (I) or female (J) speed for the same stimuli. Calcium and speed data come from flies of the same genotype (Dsx/GCaMP).

Similar results were obtained when using speed data from wild type flies (NM91) instead (Fig. S5G-H). pC2I and behavioral responses are highly correlated for pulse with a sex-specific sign (female (I): pulse:  $r=-0.49$ ,  $p=1 \times 10^{-3}$ , sine:  $r=-0.09$ ,  $p=0.73$ ; male (J): pulse:  $r=0.70$ ,  $p=5 \times 10^{-4}$ , sine:  $r=-0.20$ ,  $p=0.78$ ), just as for the LJ (compare Fig. 3I). The match between neuronal and behavioral tuning for pulse song indicates that pC2I neurons detect the pulse song. Each point corresponds to an individual stimulus ( $\Delta$ speed:  $N \sim 100$  flies per stimulus,  $\Delta F/F$ :  $N=10-24$  female and 1-6 male flies/stimulus).

**K** Comparison across individuals of most frequent IPIs in male song ( $n=75528$  pulses from 27 males) and preferred IPIs in the female LJ (integral  $\Delta F/F$ ;  $n=11$  females) and behavior ( $\Delta$ speed;  $n=112$  females NM91 and 92 females Dsx/GCaMP). Song and speed are shown for NM91 (blue), LJ and speed are shown for Dsx/GCaMP (orange). While all males produce songs with IPIs around 36ms, female neuronal and behavioral tuning for IPI is much more variable (standard deviations: 2.4ms for male song, 14ms for female  $\Delta F/F$  (for integral  $\Delta F/F$  (shown), 7ms for peak  $\Delta F/F$ ), 23 and 27ms for the speed of NM91 and Dsx/GCaMP females, respectively). Notably, variability in female speed is larger than in the female LJ, indicating that pathways parallel to or downstream of the LJ contribute to the behavior. All  $\Delta$ speed and  $\Delta F/F$  values are from flies expressing GCaMP6m under the control of Dsx-Gal4. All correlation values are Spearman's rank correlation. See also Figure S5 and Movie S5 and S6.

**Figure 5**

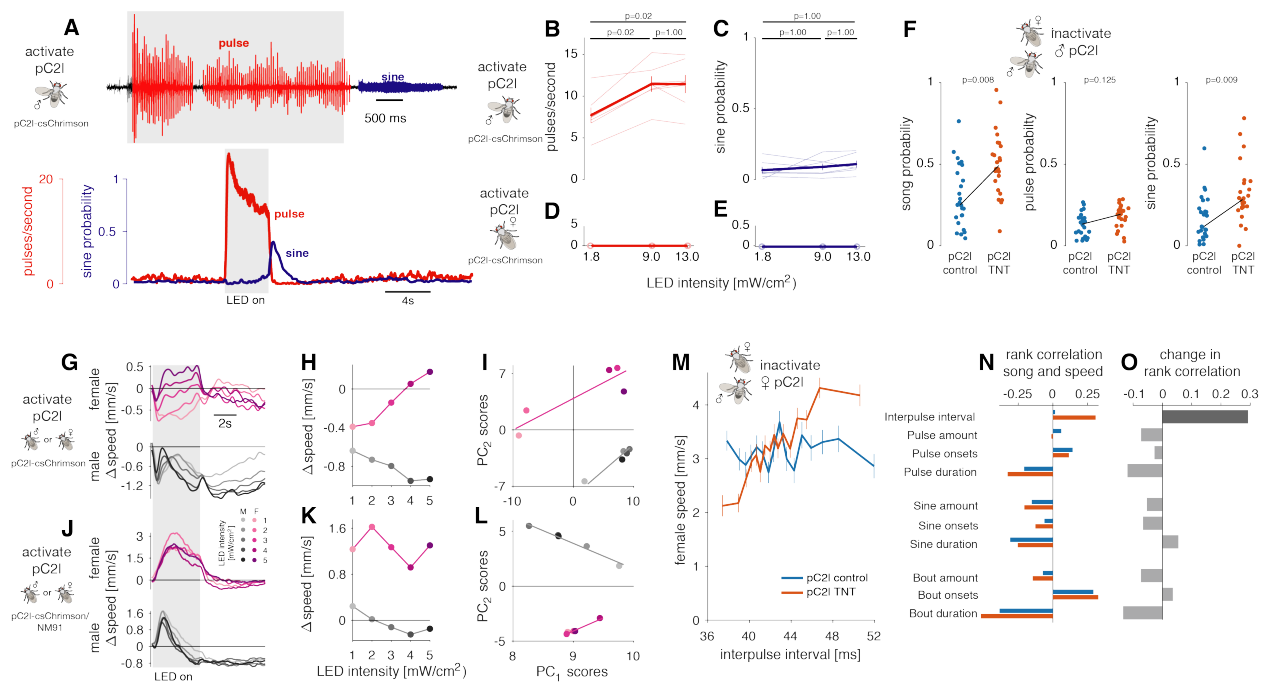

**Figure 5 – Testing the necessity and sufficiency of pC2 neurons for song and locomotor behaviors.**

**A** Song evoked in males by optogenetic activation (627nm LEDs, intensity 13 mW/cm<sup>2</sup>) of a driver line that labels pC2I and pCd neurons (R42B01 $\Delta$ Dsx, referred to as pC2I-csChrimson). Top trace shows a song recording marking pulse and sine song in red and blue, respectively. The grey area indicates the duration (4 seconds) of optogenetic activation. Pulse song is evoked during activation while sine song occurs immediately following activation. Bottom plots show pulse rate (red) and sine song probability (blue) averaged over 7 flies (18 stimulation epochs per animals). See also Movie S7. Activation of pC2I using a different genotype (pC2I-csChrimson/NM91) has similar effects (Fig. S6I, J)

**B, C** Average pulse rate (B) and sine song probability (C) evoked in the 6 seconds following LED light onset (LED duration is 4 seconds). Dose-response curves for individuals are shown as thin lines, population averages (mean $\pm$ s.e.m.) are shown as thick lines with error bars. P-values result from two-sided sign tests and are adjusted for multiple comparisons using Bonferroni's method. Same data as in A. See also Supp. Movie S7, S8.

**D, E** Same as B, C but for females (N=3 flies). Activation of pC2I (and pCd) in the female does not evoke song – pC2I activation drives singing in a sex-specific manner.

**F** Song of males courting wild type NM91 females. pC2I synaptic output in the males was inhibited using TNT via the R42B01 $\Delta$ Dsx driver. Dots correspond to the amount of all song (left), pulse song (middle), and sine song (right) (pC2I TNT (N=24) – orange, pC2I control (N=25) – blue). Black lines connect the means of the two genotypes. P-values show the outcome of a two-sided rank sum test. Inhibiting pC2I output leads to more overall singing and sine song, but not to more pulse song, indicating that pC2I biases singing towards pulse song during courtship. Other song features are not affected (see Fig. S6F-H).

**G, H** Optogenetic activation of R42B01 $\Delta$ Dsx using csChrimson (pC2I-csChrimson) evokes locomotor responses with sex-specific dynamics. Changes in speed (G) and tuning curves (H) were corrected for intrinsic light responses by subtracting the responses of control flies with the same genotype that were not fed retinal (see Fig. S6K). Females (top, magenta) slow for weak and speed for strong activation with multi-phasic dynamics as for sound (H, I, compare D). Males decrease their speed and responses outlast the optogenetic stimulus (bottom, grey). See also Supp. Movie S9. See S6K for N flies. The grey area indicates the duration of LED stimulation (4 seconds).

**I** Principal component (PC) analysis of male and female locomotor speed traces (12s following stimulus LED or sound onset, traces taken from G). Shown are first and second principal component (PC) scores of females (magenta) and males (grey) for sound (squares) and optogenetic stimulation (circles). Lines correspond to least-square fits for each sex. Female and male responses to different LED occupy different areas in PC space, indicating that the locomotor dynamics are sex-specific.

**J, K** Same as G, H but with a different genotype (pC2I-csChrimson/NM91 – see Methods for details). Females (top, magenta) speed throughout the stimulation (J) and for all LED intensities (K). Males (bottom, grey) first speed and then slow for all LED intensities. The evoked locomotor dynamics differ between genotypes (I) but are always sex-specific.

**L** Same as I but with the pC2I-csChrimson/NM91 phenotype. Again, male and female locomotor responses are different, since they occupy different areas in PC space (compare panel I).

**M** Locomotor tuning for IPI during natural courtship obtained from single females that were courted by a wild-type NM91 male. pC2I synaptic output in the females was inhibited using TNT using the R42B01 $\Delta$ Dsx driver. Lines and error bars correspond to the mean $\pm$ s.e.m speed of N females per genotype tested (pC2I TNT– orange, pC2I control – blue, N=48 females for each genotype, see methods for details on how the tuning curves were computed). pC2I control females (blue) do not change their speed with IPI within the range commonly produced by males ( $r=0.02$ ,  $p=0.59$ , compare Fig. 1D). pC2I TNT females (orange) accelerate for longer IPIs ( $r=0.31$ ,  $p=3\times 10^{-30}$ ).

**N** Rank correlation between female speed and different song features during natural courtship (pC2I control – blue, pC2I TNT – orange).

**O** Difference between the rank correlations for control (blue) and pC2I TNT (orange) flies in N. pC2I inactivation specifically changes the correlation between female speed and IPI (dark gray,  $p=6\times 10^{-8}$ ). All other changes in correlation are much smaller and not significant ( $p>0.18$ ). P-values were obtained by fitting an ANCOVA model (see methods for details) and were corrected for multiple comparisons using the Bonferroni method.

All correlation values are Spearman's rank correlation.

See also Figure S6 and Movie S7.

**Figure 6**

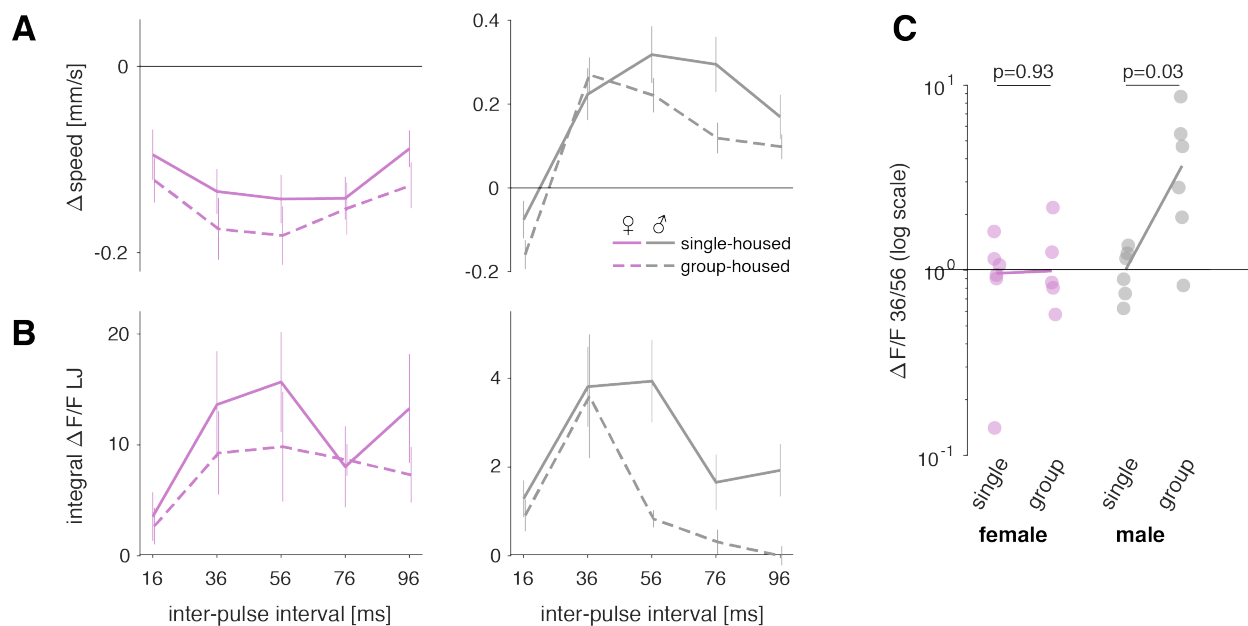

**Figure 6 – Behavioral and pC2 responses are similarly modulated by social experience.**

**A** Changes in speed for pulse trains measured using FLYTRAP with different IPIs in single-housed (solid line) or group-housed (dashed lines) female (left, magenta) and male flies (right, grey). Plots show mean  $\pm$  s.e.m. across 92/116 group-housed and 137/71 single-housed female/male flies. Female IPI tuning is not strongly affected by housing conditions. By contrast, males change their speed more selectively when group-housed.

**B** Calcium responses from the LJ for pulse trains with different IPIs in single-housed (solid line) or group-housed (dashed lines) female (left, magenta) and male flies (right, grey). Plots show mean  $\pm$  s.e.m. across 5-6 female or male flies in each condition. In females, group housing only weakly suppresses LJ responses for some IPIs. By contrast, male LJ responses are selectively suppressed for long IPIs, which sharpens the IPI tuning.

**C** Ratio of Calcium responses to 36 and 56 ms IPIs in single-housed or group-housed female (left, magenta) and male flies (right, grey). Individual dots correspond to individual flies, the solid lines connect the population average ratios. P-values were obtained from a two-sided rank sum test.

All  $\Delta$ speed and  $\Delta F/F$  values are from flies expressing GCaMP6m under the control of Dsx-Gal4. See also Figure S7.



## Flies

The following fly lines were used in our study:

| Genotype                                                                                                                                                                                                                                                     | Figures                                              | Source/comment                                                                                                                      |
|--------------------------------------------------------------------------------------------------------------------------------------------------------------------------------------------------------------------------------------------------------------|------------------------------------------------------|-------------------------------------------------------------------------------------------------------------------------------------|
| <i>D. melanogaster</i> NM91                                                                                                                                                                                                                                  | 1, 2, S1, S2E, S3, S6B-C                             | gift from Peter Andolfatto                                                                                                          |
| 8 <i>D. melanogaster</i> strains CM07, CarM03, N30, NM91, TZ58, ZH23, ZW109, and Canton S (lab stock)                                                                                                                                                        | S2A                                                  | Canton S is a lab stock, the 7 other strains are a gift from Peter Andolfatto                                                       |
| UAS-20X-GCaMP6m,UAS-tdTomato;dsx-Gal4 (Chen et al., 2013; Rideout et al., 2010)                                                                                                                                                                              | 3B-I, 4B-K, 6A-C<br>S2B-E, S4, S5A-C, F-H, S7        | dsx-Gal4 is a gift from Stephan Goodwin                                                                                             |
| UAS-eGFPX2;dsx-Gal4 (Rideout et al., 2010)                                                                                                                                                                                                                   | 3A                                                   |                                                                                                                                     |
| UAS>STOP>CsChrimson.mVenus/LexAop-flp; dsx-LexA, 8LexAop2-flp/R42B01-Gal4 (Klapoetke et al., 2014; Zhou et al., 2015; 2014)                                                                                                                                  | 5A-E, G-L<br>S2A<br>S6A-E, K<br>("pC2/csChrimson")   | R42B01-Gal4 and dsx-LexA are gifts from Bruce Baker. Drives expression of csChrimson in pC2 neurons and in a few pCd1/pCd2 neurons. |
| UAS>STOP>CsChrimson.mVenus, LexAop-flp/NM91; dsx-LexA, 8LexAop2-flp, R42B01-Gal4/NM91 or<br>UAS>STOP>CsChrimson.mVenus/NM91; dsx-LexA, 8LexAop2-flp, R42B01-Gal4/NM91 or<br>UAS>STOP>CsChrimson.mVenus, LexAop-flp/NM91; dsx-LexA, R42B01-Gal4/NM91 ("NM91") | 5G-L<br>S2A<br>S6 I, J, L<br>("pC2/csChrimson/NM91") |                                                                                                                                     |
| UAS-GCaMP6m, UAS-TdTom/+;R42B01-Gal4/+ (Chen et al., 2013; Zhou et al., 2015; 2014)                                                                                                                                                                          | S6A, right                                           | R42B01-Gal4 is a gift from Bruce Baker                                                                                              |
| UAS>STOP>csChrimson/LexAop-flp; dsx-LexA, 8LexAop-Flp/R41A01-Gal4 (Klapoetke et al., 2014; Zhou et al., 2014)                                                                                                                                                | S6D                                                  | Used to control for pCd1 neurons in the R42B01-Dsx intersection                                                                     |
| UAS>STOP>TNT/LexAop-flp; dsx-LexA/R42B01-Gal4 (Sweeney et al., 1995; Zhou et al., 2015; 2014)                                                                                                                                                                | 5F, M-O<br>S6F-H, M-O                                | Inhibit synaptic output of pC2 neurons in females and males during courtship                                                        |
| +/LexAop-flp; dsx-LexA/R42B01-Gal4 (Zhou et al., 2015; 2014)                                                                                                                                                                                                 | 5F, M-O<br>S6F-H, M-O                                | Control for pC2 TNT females and males                                                                                               |
| R71G01.AD/UAS-myrGFP;dsx.DBD/+ (Pan et al., 2012)                                                                                                                                                                                                            | 4A (pC1)                                             | R71G01.AD is a gift from Gerald Rubin, dsx.DBD is a gift from Stephen Goodwin                                                       |
| R57G10-flpG5/+; dsx-Gal4/10UAS>STOP>HA, 10UAS>STOP>V5,10UAS>STOP>FLAG (Nern et al., 2015; Rideout et al., 2010)                                                                                                                                              | 4A (pMN2), 4E, S5E                                   | Bloomington #64088 crossed with ;;dsx-Gal4                                                                                          |
| R57G10-flp/+; dsx-Gal4/10UAS>STOP>HA, 10UAS>STOP>V5,10UAS>STOP>FLAG (Nern et al., 2015; Rideout et al., 2010)                                                                                                                                                | 4A (pC2l), S5D                                       | Bloomington #64087 crossed with ;;dsx-Gal4                                                                                          |

## **FLyTRAP**

Fly behavior was recorded with PointGrey cameras (FL3-U3-13Y3M-C or FL3-U3-13E4C-C). Grey color frames with a resolution of 1280x960 pixels were acquired at 30 frames per second using custom written software in python and saved as compressed videos. Sound representation was controlled using custom software written in Matlab. The sound stimuli were converted to an analog voltage signal using a National Instruments DAQ card (PCIe-6343). The signal was then amplified by a Samson s-amp headphone amp and used to drive a speaker (HiVi F6 6-1/2" Bass/Midrange). Sound intensity was calibrated as in (Clemens et al., 2015) by converting the voltage of a calibrated microphone (placed where the fly chambers would be during an experiment) to sound intensity and adjusting the sound amplification to match the target intensity. Sound and video were synchronized by placing into the camera's field-of-view a 650nm LED whose brightness was controlled using a copy of the sound signal. The chamber consisted of an array of 12 small arenas (7 by 46 mm, made from red plastic) was placed in front of the loudspeaker (Movie S1). The arena floor consisted of plastic mesh to let sound into the chamber and the top was covered with a thin, translucent plastic sheet. Flies were illuminated using a white LED back light from below and a desk lamp from above.

### **Playback experiments**

Virgin male and female flies were isolated within 6 hours of eclosion and aged for 3-7 days prior to the experiments. Flies were raised at low density on a 12:12 dark:light cycle, at 25°C and 60% humidity. Flies were introduced gently into the chamber using an aspirator. Recordings were performed at 25°C and timed to start within 60 minutes of the incubator lights switching on to catch the morning activity peak. Stimulus playback was block-randomized to ensure that all stimuli within a set occur at the same overall rate throughout the stimulus. The stimulus set (e.g. five pulse trains with different IPIs, see Supplemental Table 1 for a list of all stimulus sets) was repeated for the duration of the experiment (2 hours). Stimuli were interleaved by 60 seconds of silence to reduce crosstalk between responses to subsequent stimulus presentations.

### **Stimulus design**

Sound was generated at a sampling frequency of 10 kHz using custom Matlab scripts. Sine song stimuli were created as pure tones of the specified frequency and intensity (typically 5mm/s). Pulse song was generated by arranging Gabor wavelets in trains interleaved by a specified pause. The Gabor wavelets were built by modulating the amplitude of a short sinusoidal using a Gaussian:  $\exp(-t^2/(2\sigma^2)) \sin(2\pi f * t + \phi)$ , where  $f$  is the pulse carrier frequency,  $\phi$  is the phase of carrier, and  $\sigma$  is proportional to the pulse duration. The parameters for all stimuli used along with the behavioral responses obtained in FLYTRAP are listed in Supplemental Table 1.

### **Analysis of FLYTRAP data**

Fly positions were tracked using custom-written software. Briefly, the image background was estimated as the median of 500 frames spaced to cover the full video. Foreground pixels (corresponding to the fly body) were identified by thresholding the absolute values of the

difference between each frame and the background estimate. The fly center position was then taken as the median of the position of all foreground pixels in each chamber. The sequence of fly positions across video frames was then converted into a time series using the light onset frames of the synchronization LED (indicating sound onset) as a reference. From the position time series fly speed was calculated and the speed traces were then aligned to stimulus onset for each trial. Base line speed was calculated as the average of the speed over an interval starting 30 seconds and ending 2 seconds before stimulus onset. Test speed was calculated over an interval starting at stimulus onset and ending 2 seconds after stimulus offset. Tuning curves were calculated as the difference between baseline speed and test speed for each trial, averaged over trials for each stimulus and animal. Speed traces were obtained by subtracting the baseline speed from the trace for each trial and averaging over trials for each stimulus and animal. All data (tuning curves, speed traces) are presented as mean  $\pm$  s.e.m. over flies. Code for stimulus generation, fly tracking and analysis of the locomotion data is available at <https://github.com/murthylab/flytrapanalyses>.

### **Manual scoring of wing extension in FLYTRAP**

To evaluate the number of flies that extend their wings upon playback of pulse or sine song, we manually scored wing extension in the videos using the VirtualDub software. For pulse song (see Movie S2), we scored 25 stimuli/fly, choosing trials randomly but ensuring that each IPI (16/36/56/76/96 ms) was scored 5 times/fly. To avoid bias, the scorer was blind to the IPI presented to the fly in each trial. A total of 120 male flies and 36 female flies were scored (3000 and 900 single-fly responses total for pulse song). We scored wing extension only when the wing was extended in the first 1/3 second following stimulus onset, and only when the wings were not extended during the 1 second before stimulus onset. For sine song (150Hz carrier frequency), 60 males were scored.

### **Joint tuning for pulse duration and pulse pause**

To visualize locomotor (Fig. S3E, F) and calcium (Fig. S4D,E) responses to pulse trains with different combinations of pulse duration and pulse pause we generated smooth surface plots using Matlab's "scatteredInterpolant" function with the interpolation mode set to "natural". The boundaries of the plots were set as follows: Pulse duration of zero corresponds to silence and the speed values were set to 0 since all speed traces are always base line subtracted. A pulse pause of zero corresponds to a continuous oscillation and we set the corresponding speed values to those obtained for a 4 second pure tone with a frequency of 250 Hz.

### **Measurement of song features from natural song data**

The inter-pulse interval (IPI) is given by the interval between the peaks of subsequent pulses in a pulse train. Pulse trains correspond to continuous sequences of pulses with IPIs smaller than 200ms. Measuring the pulse durations from natural song data is non-trivial since pulses vary in their shape and can be embedded in background noise. We quantified pulse duration by 1) calculating the envelope of each pulse using the Hilbert transform, 2) smoothing that envelope using a Gaussian window with a standard deviation of 2 ms, and 3) taking as the pulse duration the full width of the smoothed envelope at 20% of the maximum amplitude of the pulse. Pulse

durations for artificial stimuli used in our pulse train were defined to be consistent with this method. Pulse carrier frequency is given by the center of mass of the amplitude spectrum of each pulse (Clemens et al., 2017). Sine carrier frequency was calculated as the peak frequency of the power spectrum of individual sine tones.

### **PCA of speed traces**

For the PCA of sex-specific responses to sound and optogenetic activation of pC2 (Fig. 5L) we collected male and female speed traces for all IPIs (Fig. 5D, F) and optogenetic activation levels (Fig. 5H, J) into a large matrix. Each speed trace was cut to include only the 10 seconds after sound onset and then normalized to have zero mean and unit variance.

### **Optogenetic experiments**

CsChrimson was expressed in pC2 neurons using an intersection between R42B01-Gal4 and dsx-LexA using two different genotypes (see table, pC2/csChrimson and pC2/csChrimson/NM91). 655nm light was emitted from a ring of 6 Tri-Star LEDs (LuxeonStar, SinkPAD-II 20mm Tri-Star Base) in FLYTRAP (Fig. 5D-K). Flies were fed with food that contained all-trans retinal for a minimum of three days post eclosion. Control flies were raised on regular fly food after eclosion. LED stimulation lasted four seconds with 60 seconds pause between stimuli, similar to the temporal pattern used for auditory stimulus delivery in FLYTRAP (1-5mW/cm<sup>2</sup>, 100Hz, duty cycle 0.5). Smaller intensities of 0.1-1wW/cm<sup>2</sup> were not sufficient to drive changes in speed in the pC2/csChrimson/NM91 genotype (data not shown). To measure the amount of song driven by pC2 activation in solitary flies of the pC2/csChrimson and the pC2/csChrimson/NM91 genotype, we used a chamber whose floor was tiled with 16 microphones to allow recording of the song (Fig. 5A-C, Movie S7; see (Clemens et al., 2017)). The LED (627nm LEDs, LuxeonStar) was on for four seconds (frequency 25 Hz, duty cycle 0.5) and off for 60 seconds. For pC2/csChrimson, we tested three different light intensities (1.8, 9, and 13 mW/cm<sup>2</sup>) that were presented in 3 blocks of 18 trials. The order of the three blocks (light intensities) was randomized for each fly. pC2/csChrimson/NM91 was tested with 9mW/cm<sup>2</sup> in 10 trials. Fly song was segmented as described previously (Arthur et al., 2013; Coen et al., 2014).

### **pC2 inactivation in females and males during courtship**

Tetanus neurotoxin light chain (TNT) (Sweeney et al., 1995) was used to block synaptic transmission in pC2 neurons in females and males. 3-7 days old virgin females or males (pC2-TNT: UAS>STOP>TNT/LexAop-flp; dsx-LexA/R42B01-Gal4, pC2-control: +/LexAop-flp; dsx-LexA/R42B01-Gal4) were paired with wild type flies (NM91) of the opposite sex, in a custom-built chamber designed to record fly song (~25 mm diameter, tiled with 16 microphones; same setup as the one used for measuring optogenetic driven song). Flies were allowed to interact for 30 minutes, and the percent of flies copulated as a function of time was scored. A monochrome camera (Point Grey, FL3-U3-13Y3M) was used to record the fly behavior at 60 frames per second. Fly position was tracked offline and song was segmented as previously described (Arthur et al., 2013; Coen et al., 2014). We then calculated song statistics (e.g. amount of song or number of pulses per window) and female locomotion (average female

speed) in windows of 60s with 30s overlap (Clemens et al., 2015). For the rank correlations between male song features and female speed (Fig. 5M-O), we binned the female speed values into 16 bins with the bin edges chosen such that each bin was populated by an equal amount of samples (see Fig. 5M) and calculated the rank correlation between the binned female speed and the average male song feature per bin. Changes in correlation between control and experimental flies (Fig. 5O) were analyzed using an ANCOVA model with independent slopes and intercepts. Significance was determined based on the p-value of the interaction term (model's genotype by song-feature) after Bonferroni correction.

### **Calcium imaging**

Imaging experiments were performed on a custom built two-photon laser scanning microscope equipped with 5mm galvanometer mirrors (Cambridge Technology), an electro-optic modulator (M350-80LA-02 KD\*P, Conoptics) to control the laser intensity, a piezoelectric focusing device (P-725, Physik Instrumente) for volumetric imaging, a Chameleon Ultra II Ti:Sapphire laser (Coherent) and a water immersion objective (Olympus XLPlan 25X, NA=1.05). The fluorescence signal collected by the objective was reflected by a dichroic mirror (FF685 Dio2, Semrock), filtered using a multiphoton short-pass emission filter (FF01-680/sp-25, Semrock), split by a dichroic mirror (FF555 Dio3, Semrock) into two channels, green (FF02-525/40-25, Semrock) and red (FF01-593/40-25, Semrock), and detected by GaAsP photo-multiplier tubes (H10770PA-40, Hamamatsu). Laser power (measured at the sample plane) was restricted to 15 mW. The microscope was controlled in Matlab using ScanImage 5.1 (Vidrio). Single plane calcium signals (Fig. 3C-I, 4F,G and pMN2 neuron in Fig 4C-E) were scanned at 8.5 Hz (256X256 pixels). Pixel size was  $\sim 0.5\mu\text{m} \times 0.5\mu\text{m}$  when imaging the lateral junction or pC2l process and  $\sim 0.25\mu\text{m} \times 0.25\mu\text{m}$  when imaging cell bodies in a single plan (Fig 4G and pMN2 in Fig. 4B-D). For volumetric scanning of cell bodies (Figs 4B-D, S5A), volumes were acquired at 0.5Hz (256\*216, 20 planes, voxel size  $\sim 0.34\mu\text{m} \times 0.4\mu\text{m} \times 1.5\mu\text{m}$ ), scanning one group of cells at a time (pC1, pC2, pCd).

After surgery (opening of the head capsule to reveal the brain), flies were placed beneath the objective and perfusion saline was continuously delivered directly to the meniscus. Sound playback was controlled using custom written Matlab software (Clemens et al., 2018). The software also stopped and started the calcium imaging via a TTL pulse sent to ScanImage ("external hardware trigger" mode), and single frames were synchronized with stimulus by sensing a copy of the Y-galvo mirror to a National Instruments DAQ card (PCIe-6343) that controlled the stimulus. The sound stimulus was generated at a sampling rate of 10kHz and sent by the DAQ card through an amplifier (Crown, D-75A) to a set of head phones (Koss, 'The Plug'). A single ear plug was connected to one side of a plastic tube (outer-inner diameters 1/8"-1/16") and the outer tube tip was positioned 2 mm away from the fly arista. Sound intensity was calibrated by measuring the sound intensity 2 mm away from the tube tip with a pre-calibrated microphone at a range of frequencies (100Hz-800Hz) and the output signal was corrected according to the measured intensities. The pause between stimulus representation was 25 seconds. A stimulus set (26-36 stimuli) was presented to each fly in a

block-randomized order as in the playback experiments. Three blocks were presented for each fly. If the response decayed in the middle of a block (possibly because of drift in the z-axis), the whole block was discarded from the analysis. Typically, two full repetitions per fly were used for analysis.

Regions of interest (ROIs) for calcium response measurements (in the LJ, pC2 process and in single Dsx+ somata) were selected manually based on a z-projection of the tdTomato channel.  $\Delta F/F$  of the GCaMP signal was calculated as  $(F(t)-F_0)/F_0$ , where  $F_0$  is the mean fluorescence in the ROI in the 10 seconds preceding stimulus onset. Integral  $\Delta F/F$  (Fig. 3D, F-I) and peak  $\Delta F/F$  (Fig. 3F, inset) values were calculated in a window starting at sound stimulus onset and ending 25 seconds after sound stimulus offset. To compensate for differences in overall responsiveness across flies, we normalized  $\Delta F/F$  values of each fly by dividing the integral or peak  $\Delta F/F$  by the maximal value (of integral or peak  $\Delta F/F$ ) across all stimuli for that fly. For volumetric scanning (Fig. 4C-D, S5A) pulse song (250Hz, 16 pulse duration, 20 pulse pause), sine song (250 Hz) and broadband noise (100-900Hz) were presented 6 times each (in the order pulse-sine-noise, 6 blocks, duration of each stimulus 10 seconds with 20 of silence in between) for each group of neurons (pC1 or pC2). A cell was considered responsive to a given stimulus (pulse, sine or broadband noise) if the mean  $\Delta F$  during the stimulus was higher than the mean  $\Delta F$  in the 10 seconds before stimulus onset in 5/6 blocks. Each time series was first motion corrected using the rigid motion correction algorithm NoRMCorre (Pnevmatikakis and Giovannucci, 2017) taking the tdTomato signal as the reference image. Then, single cell bodies were drawn manually, by marking cell boundaries stack by stack. In some cases, mostly with male pC1 neurons, cell bodies were very packed, such that some ROIs we marked manually possibly included more than a single cell. The number of single cells reported from Ca imaging is therefore slightly underestimated.

### **Light microscopy**

Flies expressing GFP in Dsx+ neurons (UAS-eGFP2X; dsx-Gal4; Fig. 3A) and flies expressing CsChrimson.mVenus in pC2 neurons (R42B01-Gal4 intersected with dsx-LexA; Fig. S6) were immunostained and scanned in a confocal microscope. 2-4 day old flies were cold-anesthetized on ice, dissected in cold S2 insect medium (Sigma Aldrich, #S0146) and fixed for 30-40 minutes on a rotator at room temperature in 4% PFA in 0.3% PBTS (0.3% Triton in PBSX1), followed by 4x15 minutes washes in 0.3% PBTS and 30 minutes in blocking solution (5% normal goat serum in 0.3%PBTS). Brains were incubated over two nights at 4°C with primary antibody, washed with 0.3%PBT and incubated for two more nights at 4°C in secondary antibody, followed by washing (4x15 minutes in 0.3%PBTS and 4x20 minutes in PBS), and mounting with Vestashield for 2-7 days before imaging. Antibodies were diluted in blocking solution at the following concentrations: rabbit anti-GFP (Invitrogen #1828014; used against GFP and mVenus) 1:1000, mouse anti-Bruchpilot (nc82, DSHB AB2314866) 1:20, goat anti-rabbit Alexa Flour 488 (Invitrogen #1853312) 1:200, goat anti-mouse Alexa Flour 633 (Invitrogen #1906490) 1:200.



Stochastic labeling of Dsx+ neurons in the female brain (Fig 4A, E) was done using multi-color-flip-out (MCFO, (Nern et al., 2015)) with three different epitope tags (HA,V5,FLAG). We followed the JFRC FlyLight Protocol 'IHC-MCFO' (<https://www.janelia.org/project-team/flylight/protocols>) for the preparation of brains. Flp was induced using R5710C10 promoter-coding sequence fusions of the flpG5 and flpl. Flies were 4-7 days old when dissected. Flies were stored at 25°C. Confocal stacks were acquired with a white light laser confocal microscope (Leica TCS SP8 X) and a Leica objective (HC PL APO 20x/0.75 CS2). A high-resolution scan of a pC2 cell (Fig 4E) was performed with an oil immersion Leica objective (HC PL APO 63x/1.40 Oil CS2, fig 4E). Images were registered to the Janelia brain template (JFRC2) (Jenett et al., 2012) using vfbaligner (<http://vfbaligner.inf.ed.ac.uk>), which internally uses CMTK for registration (Rohlfing and Maurer, 2003). The images of the fly brain in Figs 4A and S5D were deposited by G. Jefferis (Jefferis, 2014). Image processing was performed in FIJI (Schindelin et al., 2012)

## References

- Arthur, B.J., Sunayama-Morita, T., Coen, P., Murthy, M., Stern, D.L., 2013. Multi-channel acoustic recording and automated analysis of *Drosophila* courtship songs. *BMC Biol* 11, 11. doi:10.1186/1741-7007-11-11
- Chen, T.-W., Wardill, T.J., Sun, Y., Pulver, S.R., Renninger, S.L., Baohan, A., Schreiter, E.R., Kerr, R.A., Orger, M.B., Jayaraman, V., Looger, L.L., Svoboda, K., Kim, D.S., 2013. Ultrasensitive fluorescent proteins for imaging neuronal activity. *Nature* 499, 295–300. doi:10.1038/nature12354
- Clemens, J., Coen, P., Roemschied, F., Pereira, T., Mazumder, D., Pacheco, D., Murthy, M., 2017. Discovery of a new song mode in *Drosophila* reveals hidden structure in the sensory and neural drivers of behavior. *bioRxiv* 221044. doi:10.1101/221044
- Clemens, J., Girardin, C.C., Coen, P., Guan, X.-J., Dickson, B.J., Murthy, M., 2015. Connecting Neural Codes with Behavior in the Auditory System of *Drosophila*. *Neuron* 87, 1332–1343. doi:10.1016/j.neuron.2015.08.014
- Clemens, J., Ozeri-Engelhard, N., Murthy, M., 2018. Fast intensity adaptation enhances the encoding of sound in *Drosophila*. *Nat Commun* 9, 134. doi:10.1038/s41467-017-02453-9
- Coen, P., Clemens, J., Weinstein, A.J., Pacheco, D.A., Deng, Y., Murthy, M., 2014. Dynamic sensory cues shape song structure in *Drosophila*. *Nature* 507, 233–237. doi:10.1038/nature13131
- Jefferis, G.S.X.E., 2014. JFRC2 Template Brain. doi:10.5281/zenodo.10567
- Jenett, A., Rubin, G.M., Ngo, T.-T.B., Shepherd, D., Murphy, C., Dionne, H., Pfeiffer, B.D., Cavallaro, A., Hall, D., Jeter, J., Iyer, N., Fetter, D., Hausenfluck, J.H., Peng, H., Trautman, E.T., Svirska, R.R., Myers, E.W., Iwinski, Z.R., Aso, Y., DePasquale, G.M., Enos, A., Hulamm, P., Lam, S.C.B., Li, H.-H., Laverty, T.R., Long, F., Qu, L., Murphy, S.D., Rokicki, K., Safford, T., Shaw, K., Simpson, J.H., Sowell, A., Tae, S., Yu, Y., Zugates, C.T., 2012. A GAL4-Driver Line Resource for *Drosophila* Neurobiology. *Cell Reports* 2, 991–1001. doi:10.1016/j.celrep.2012.09.011
- Klapoetke, N.C., Murata, Y., Kim, S.S., Pulver, S.R., Birdsey-Benson, A., Cho, Y.K., Morimoto, T.K., Chuong, A.S., Carpenter, E.J., Tian, Z., Wang, J., Xie, Y., Yan, Z., Zhang, Y., Chow, B.Y., Surek, B., Melkonian, M., Jayaraman, V., Constantine-Paton, M., Wong, G.K.-S., Boyden, E.S., 2014. Independent optical excitation of distinct neural populations. *Nat. Methods* 11, 338–346. doi:10.1038/nmeth.2836

- Nern, A., Pfeiffer, B.D., Rubin, G.M., 2015. Optimized tools for multicolor stochastic labeling reveal diverse stereotyped cell arrangements in the fly visual system. *Proc Natl Acad Sci U S A* 112, E2967–76. doi:10.1073/pnas.1506763112
- Pan, Y., Meissner, G.W., Baker, B.S., 2012. Joint control of *Drosophila* male courtship behavior by motion cues and activation of male-specific P1 neurons. *Proc Natl Acad Sci U S A* 109, 10065–10070. doi:10.1073/pnas.1207107109
- Pnevmatikakis, E.A., Giovannucci, A., 2017. NoRMCorre: An online algorithm for piecewise rigid motion correction of calcium imaging data. *Journal of Neuroscience Methods* 291, 83–94. doi:10.1016/j.jneumeth.2017.07.031
- Rideout, E.J., Dornan, A.J., Neville, M.C., Eadie, S., Goodwin, S.F., 2010. Control of sexual differentiation and behavior by the doublesex gene in *Drosophila melanogaster*. *Nature neuroscience* 13, 458–466. doi:10.1038/nn.2515
- Rohlfing, T., Maurer, C.R., 2003. Nonrigid image registration in shared-memory multiprocessor environments with application to brains, breasts, and bees. *IEEE Trans Inf Technol Biomed* 7, 16–25.
- Schindelin, J., Arganda-Carreras, I., Frise, E., Kaynig, V., Longair, M., Pietzsch, T., Preibisch, S., Rueden, C., Saalfeld, S., Schmid, B., Tinevez, J.-Y., White, D.J., Hartenstein, V., Eliceiri, K., Tomancak, P., Cardona, A., 2012. Fiji: an open-source platform for biological-image analysis. *Nat. Methods* 9, 676–682. doi:10.1038/nmeth.2019
- Sweeney, S.T., Broadie, K., Keane, J., Niemann, H., O'Kane, C.J., 1995. Targeted expression of tetanus toxin light chain in *Drosophila* specifically eliminates synaptic transmission and causes behavioral defects. *Neuron* 14, 341–351. doi:10.1016/0896-6273(95)90290-2
- Zhou, C., Franconville, R., Vaughan, A.G., Robinett, C.C., Jayaraman, V., Baker, B.S., 2015. Central neural circuitry mediating courtship song perception in male *Drosophila*. *eLife* 4, 11. doi:10.7554/eLife.08477
- Zhou, C., Pan, Y., Robinett, C.C., Meissner, G.W., Baker, B.S., 2014. Central Brain Neurons Expressing doublesex Regulate Female Receptivity in *Drosophila*. *Neuron* 83, 149–163. doi:10.1016/j.neuron.2014.05.038
